# Supplementary material
Source: PubMed Central journal article supplement (PMC5551431)
Supplement: NIHMS877713-supplement-Supplemental_material.pdf [file NIHMS877713-supplement-Supplemental_material.pdf]

## SUPPLEMENTAL MATERIAL

### **Black-White Differences in Incident Fatal, Nonfatal and Total Coronary Heart Disease**

Lisandro D. Colantonio,<sup>1</sup> MD MSc PhD, Christopher M. Gamboa,<sup>2</sup> MPH, Joshua S. Richman,<sup>3</sup> MD PhD, Emily B. Levitan,<sup>1</sup> ScD, Elsayed Z. Soliman,<sup>4</sup> MD, MSc, MS, George Howard,<sup>5</sup> DrPH, Monika M. Safford,<sup>6</sup> MD

<sup>1</sup> Department of Epidemiology, University of Alabama at Birmingham, Birmingham, AL.

<sup>2</sup> Department of Medicine, School of Medicine, University of Alabama at Birmingham, Birmingham, AL.

<sup>3</sup> Department of Surgery, School of Medicine, University of Alabama at Birmingham, Birmingham, AL.

<sup>4</sup> Epidemiological Cardiology Research Center (EPICARE), Wake Forest School of Medicine, Winston-Salem, NC.

<sup>5</sup> Department of Biostatistics, School of Public Health, University of Alabama at Birmingham, Birmingham, AL.

<sup>6</sup> Department of Medicine, Weill Cornell Medical College, New York, NY.

Colantonio - Racial differences in CHD

**Supplemental table 1.** Distribution of missing data among ARIC, CHS and REGARDS study participants included in the analysis stratified by gender.

|                                    | Men                        |                               |                           |                               | Women                      |                               |                           |                               |
|------------------------------------|----------------------------|-------------------------------|---------------------------|-------------------------------|----------------------------|-------------------------------|---------------------------|-------------------------------|
|                                    | 45-64 years of age         |                               | ≥65 years of age          |                               | 45-64 years of age         |                               | ≥65 years of age          |                               |
|                                    | ARIC<br>(N=6,479)<br>n (%) | REGARDS<br>(N=5,296)<br>n (%) | CHS<br>(N=1,836)<br>n (%) | REGARDS<br>(N=3,381)<br>n (%) | ARIC<br>(N=8,488)<br>n (%) | REGARDS<br>(N=7,822)<br>n (%) | CHS<br>(N=2,790)<br>n (%) | REGARDS<br>(N=4,112)<br>n (%) |
| Baseline characteristics           |                            |                               |                           |                               |                            |                               |                           |                               |
| Age                                | 0 (0.0)                    | 0 (0.0)                       | 0 (0.0)                   | 0 (0.0)                       | 0 (0.0)                    | 0 (0.0)                       | 0 (0.0)                   | 0 (0.0)                       |
| Blacks                             | 0 (0.0)                    | 0 (0.0)                       | 0 (0.0)                   | 0 (0.0)                       | 0 (0.0)                    | 0 (0.0)                       | 0 (0.0)                   | 0 (0.0)                       |
| Region of residence                | NA                         | 0 (0.0)                       | NA                        | 0 (0.0)                       | NA                         | 0 (0.0)                       | NA                        | 0 (0.0)                       |
| Less than high school education    | 14 (0.2)                   | 0 (0.0)                       | 6 (0.3)                   | 3 (0.1)                       | 12 (0.1)                   | 7 (0.1)                       | 7 (0.3)                   | 1 (0.02)                      |
| Annual household income <\$25,000  | 334 (5.2)                  | 211 (4.0)                     | 87 (4.7)                  | 139 (4.1)                     | 534 (6.3)                  | 373 (4.8)                     | 213 (7.6)                 | 307 (7.5)                     |
| Alcohol consumption                | 43 (0.7)                   | 109 (2.1)                     | 9 (0.5)                   | 85 (2.5)                      | 47 (0.6)                   | 128 (1.6)                     | 9 (0.3)                   | 61 (1.5)                      |
| Physical activity                  | 15 (0.2)                   | 69 (1.3)                      | 2 (0.1)                   | 58 (1.7)                      | 10 (0.1)                   | 80 (1.0)                      | 1 (0.04)                  | 87 (2.1)                      |
| Current smoking                    | 3 (0.05)                   | 21 (0.4)                      | 3 (0.2)                   | 15 (0.4)                      | 13 (0.2)                   | 30 (0.4)                      | 3 (0.1)                   | 11 (0.3)                      |
| Diabetes                           | 58 (0.9)                   | 152 (2.9)                     | 0 (0.0)                   | 97 (2.9)                      | 84 (1.0)                   | 317 (4.1)                     | 0 (0.0)                   | 179 (4.4)                     |
| Reduced eGFR                       | 47 (0.7)                   | 170 (3.2)                     | 17 (0.9)                  | 99 (2.9)                      | 96 (1.1)                   | 350 (4.5)                     | 40 (1.4)                  | 200 (4.9)                     |
| History of stroke                  | 15 (0.2)                   | 8 (0.2)                       | 0 (0.0)                   | 9 (0.3)                       | 26 (0.3)                   | 21 (0.3)                      | 0 (0.0)                   | 19 (0.5)                      |
| Waist circumference (cm)           | 13 (0.2)                   | 13 (0.2)                      | 10 (0.5)                  | 11 (0.3)                      | 13 (0.2)                   | 68 (0.9)                      | 18 (0.6)                  | 33 (0.8)                      |
| SBP (mmHg)                         | 8 (0.1)                    | 10 (0.2)                      | 3 (0.2)                   | 9 (0.3)                       | 6 (0.1)                    | 25 (0.3)                      | 6 (0.2)                   | 11 (0.3)                      |
| Taking antihypertensive medication | 35 (0.5)                   | 251 (4.7)                     | 4 (0.2)                   | 109 (3.2)                     | 41 (0.5)                   | 328 (4.2)                     | 8 (0.3)                   | 146 (3.6)                     |
| Total cholesterol (mg/dL)          | 77 (1.2)                   | 169 (3.2)                     | 10 (0.5)                  | 99 (2.9)                      | 161 (1.9)                  | 349 (4.5)                     | 30 (1.1)                  | 200 (4.9)                     |
| HDL cholesterol (mg/dL)            | 77 (1.2)                   | 183 (3.5)                     | 13 (0.7)                  | 112 (3.3)                     | 159 (1.9)                  | 395 (5.0)                     | 32 (1.1)                  | 233 (5.7)                     |
| Taking lipid-lowering medications  | 66 (1.0)                   | 0 (0.0)                       | 4 (0.2)                   | 0 (0.0)                       | 54 (0.6)                   | 0 (0.0)                       | 8 (0.3)                   | 0 (0.0)                       |
| Health insurance                   | 13 (0.2)                   | 6 (0.1)                       | NA                        | NA                            | 21 (0.2)                   | 7 (0.1)                       | NA                        | NA                            |
| Left ventricular hypertrophy       | 227 (3.5)                  | 97 (1.8)                      | 7 (0.4)                   | 59 (1.7)                      | 266 (3.1)                  | 149 (1.9)                     | 9 (0.3)                   | 74 (1.8)                      |
| Atrial fibrillation*               | NA                         | 90 (1.7)                      | 0 (0.0)                   | 69 (2.0)                      | NA                         | 167 (2.1)                     | 1 (0.04)                  | 100 (2.4)                     |
| Any missing information            | 755 (11.7)                 | 918 (17.3)                    | 139 (7.6)                 | 571 (16.9)                    | 1,081 (12.7)               | 1,497 (19.1)                  | 300 (10.8)                | 913 (22.2)                    |

ARIC: Atherosclerosis Risk In Communities; CHS: Cardiovascular Health Study; eGFR: estimated glomerular filtration rate; HDL: high-density lipoprotein; NA: not applicable; REGARDS: REasons for Geographic And Racial Differences in Stroke; SBP: systolic blood pressure.

\* Data on atrial fibrillation at baseline was not included in the ARIC publicly available dataset.

Colantonio - Racial differences in CHD

**Supplemental table 2.** Baseline characteristics of ARIC, CHS and REGARDS study participants included in the analysis by race and gender (without multiple imputation).

| Baseline characteristics                  | 45-64 years of age |              |              |              | ≥65 years of age |              |              |              |
|-------------------------------------------|--------------------|--------------|--------------|--------------|------------------|--------------|--------------|--------------|
|                                           | ARIC               |              | REGARDS      |              | CHS              |              | REGARDS      |              |
|                                           | Blacks             | Whites       | Blacks       | Whites       | Blacks           | Whites       | Blacks       | Whites       |
| <b>MEN, N</b>                             | <b>1,534</b>       | <b>4,945</b> | <b>2,044</b> | <b>3,252</b> | <b>277</b>       | <b>1,559</b> | <b>997</b>   | <b>2,384</b> |
| Age in years, mean (SD)                   | 53.7 (5.9)         | 54.6 (5.7)   | 57.2 (4.9)   | 57.6 (4.8)   | 72.2 (5.8)       | 72.7 (5.8)   | 71.9 (5.6)   | 72.4 (5.8)   |
| Region of residence,* n (%)               |                    |              |              |              |                  |              |              |              |
| Stroke belt (buckle states)               | NA                 | NA           | 380 (18.6)   | 659 (20.3)   | NA               | NA           | 144 (14.4)   | 503 (21.1)   |
| Stroke belt (non-buckle states)           | NA                 | NA           | 751 (36.7)   | 1,105 (34.0) | NA               | NA           | 319 (32.0)   | 879 (36.9)   |
| Other contiguous US states                | NA                 | NA           | 913 (44.7)   | 1,488 (45.8) | NA               | NA           | 534 (53.6)   | 1,002 (42.0) |
| Less than high school education, n (%)    | 671 (43.9)         | 837 (17.0)   | 221 (10.8)   | 131 (4.0)    | 127 (46.2)       | 429 (27.6)   | 262 (26.3)   | 180 (7.6)    |
| Annual household income <\$25,000, n (%)  | 842 (61.3)         | 965 (20.2)   | 522 (27.0)   | 341 (10.8)   | 185 (71.2)       | 751 (50.4)   | 375 (39.5)   | 377 (16.4)   |
| Alcohol consumption, n (%)                |                    |              |              |              |                  |              |              |              |
| None                                      | 830 (55.2)         | 2,248 (45.6) | 1,126 (56.6) | 1,340 (41.9) | 142 (51.3)       | 613 (39.5)   | 614 (64.2)   | 1,214 (51.9) |
| Moderate                                  | 514 (34.2)         | 2,132 (43.2) | 783 (39.3)   | 1,650 (51.6) | 109 (39.4)       | 744 (48.0)   | 310 (32.4)   | 1,006 (43.0) |
| Heavy                                     | 159 (10.6)         | 553 (11.2)   | 81 (4.1)     | 207 (6.5)    | 26 (9.4)         | 193 (12.5)   | 32 (3.3)     | 120 (5.1)    |
| Low physical activity, n (%)              | 798 (52.4)         | 1,449 (29.3) | 541 (26.8)   | 748 (23.3)   | 161 (58.1)       | 785 (50.4)   | 306 (31.4)   | 605 (25.8)   |
| Current smoking, n (%)                    | 584 (38.1)         | 1,216 (24.6) | 503 (24.8)   | 489 (15.1)   | 60 (21.7)        | 162 (10.4)   | 124 (12.5)   | 189 (8.0)    |
| Diabetes, n (%)                           | 246 (16.5)         | 407 (8.3)    | 519 (26.3)   | 412 (13.0)   | 65 (23.5)        | 238 (15.3)   | 304 (31.8)   | 375 (16.1)   |
| Reduced eGFR, n (%)                       | 44 (2.9)           | 111 (2.2)    | 99 (5.1)     | 84 (2.7)     | 63 (23.5)        | 426 (27.5)   | 143 (15.0)   | 322 (13.8)   |
| History of stroke, n (%)                  | 52 (3.4)           | 61 (1.2)     | 117 (5.7)    | 90 (2.8)     | 30 (10.8)        | 62 (4.0)     | 108 (10.9)   | 140 (5.9)    |
| Waist circumference (cm), mean (SD)       | 96.6 (12.1)        | 99.5 (10.1)  | 99.6 (15.3)  | 100.1 (13.5) | 96.6 (10.7)      | 97.6 (9.6)   | 98.8 (13.5)  | 99.8 (12.3)  |
| SBP (mmHg), mean (SD)                     | 130.3 (21.5)       | 120.2 (16.0) | 130.3 (16.4) | 124.6 (14.2) | 138.6 (21.0)     | 136.2 (21.4) | 133.6 (17.3) | 129.4 (15.5) |
| Taking antihypertensive medication, n (%) | 502 (32.9)         | 897 (18.2)   | 1,048 (53.4) | 1,020 (33.1) | 135 (48.9)       | 559 (35.9)   | 604 (62.2)   | 1,052 (45.7) |
| Total cholesterol (mg/dL), mean (SD)      | 210.8 (43.8)       | 210.3 (38.3) | 189.6 (39.9) | 192.1 (37.7) | 192.3 (36.1)     | 201.6 (35.7) | 183.9 (39.4) | 181.7 (34.1) |
| HDL cholesterol (mg/dL), mean (SD)        | 50.8 (16.9)        | 43.1 (12.4)  | 47.8 (14.4)  | 44.2 (12.9)  | 52.0 (13.6)      | 48.0 (12.7)  | 49.2 (14.9)  | 45.3 (13.3)  |
| Taking lipid-lowering medications, n (%)  | 16 (1.1)           | 144 (2.9)    | 584 (28.6)   | 1,029 (31.6) | 9 (3.3)          | 48 (3.1)     | 357 (35.8)   | 897 (37.6)   |
| Health insurance, n (%)                   | 1,168 (76.6)       | 4,714 (95.4) | 1,715 (84.1) | 3,006 (92.5) | NA               | NA           | NA           | NA           |
| Left ventricular hypertrophy, n (%)       | 82 (5.5)           | 46 (1.0)     | 72 (3.6)     | 21 (0.7)     | 16 (5.8)         | 51 (3.3)     | 43 (4.4)     | 52 (2.2)     |
| Atrial fibrillation,† n (%)               | NA                 | NA           | 91 (4.6)     | 149 (4.6)    | 16 (5.8)         | 94 (6.0)     | 51 (5.3)     | 215 (9.2)    |

Colantonio - Racial differences in CHD

Supplemental table 2. Continuation.

| Baseline characteristics                  | 45-64 years of age |              |              |              | ≥65 years of age |              |              |              |
|-------------------------------------------|--------------------|--------------|--------------|--------------|------------------|--------------|--------------|--------------|
|                                           | ARIC               |              | REGARDS      |              | CHS              |              | REGARDS      |              |
|                                           | Blacks             | Whites       | Blacks       | Whites       | Blacks           | Whites       | Blacks       | Whites       |
| <b>WOMEN, N</b>                           | <b>2,551</b>       | <b>5,937</b> | <b>3,729</b> | <b>4,093</b> | <b>448</b>       | <b>2,342</b> | <b>1,590</b> | <b>2,522</b> |
| Age in years, mean (SD)                   | 53.3 (5.7)         | 53.9 (5.7)   | 56.9 (5.0)   | 57.0 (5.0)   | 72.3 (5.8)       | 71.6 (5.3)   | 72.1 (5.8)   | 72.6 (5.8)   |
| Region of residence,* n (%)               |                    |              |              |              |                  |              |              |              |
| Stroke belt (buckle states)               | NA                 | NA           | 751 (20.1)   | 1,061 (25.9) | NA               | NA           | 347 (21.8)   | 660 (26.2)   |
| Stroke belt (non-buckle states)           | NA                 | NA           | 1,383 (37.1) | 1,475 (36.0) | NA               | NA           | 523 (32.9)   | 962 (38.1)   |
| Other contiguous US states                | NA                 | NA           | 1,595 (42.8) | 1,557 (38.0) | NA               | NA           | 720 (45.3)   | 900 (35.7)   |
| Less than high school education, n (%)    | 1,016 (39.9)       | 964 (16.3)   | 481 (12.9)   | 206 (5.0)    | 193 (43.3)       | 567 (24.3)   | 426 (26.8)   | 209 (8.3)    |
| Annual household income <\$25,000, n (%)  | 1,753 (76.1)       | 1,777 (31.5) | 1,446 (40.9) | 745 (19.1)   | 348 (83.7)       | 1,329 (61.5) | 869 (59.5)   | 861 (36.7)   |
| Alcohol consumption, n (%)                |                    |              |              |              |                  |              |              |              |
| None                                      | 2,134 (84.9)       | 3,932 (66.4) | 2,735 (75.2) | 2,341 (57.7) | 325 (72.9)       | 1,192 (51.0) | 1,311 (84.0) | 1,717 (68.9) |
| Moderate                                  | 312 (12.4)         | 1,543 (26.0) | 833 (22.9)   | 1,486 (36.6) | 108 (24.2)       | 875 (37.5)   | 225 (14.4)   | 670 (26.9)   |
| Heavy                                     | 69 (2.7)           | 451 (7.6)    | 71 (2.0)     | 228 (5.6)    | 13 (2.9)         | 268 (11.5)   | 24 (1.5)     | 104 (4.2)    |
| Low physical activity, n (%)              | 1,511 (59.4)       | 1,892 (31.9) | 1,381 (37.4) | 1,387 (34.3) | 297 (66.3)       | 1,360 (58.1) | 709 (45.7)   | 975 (39.4)   |
| Current smoking, n (%)                    | 625 (24.6)         | 1,479 (24.9) | 711 (19.1)   | 660 (16.2)   | 58 (13.0)        | 299 (12.8)   | 165 (10.4)   | 212 (8.4)    |
| Diabetes, n (%)                           | 455 (18.4)         | 407 (6.9)    | 945 (26.5)   | 403 (10.2)   | 97 (21.7)        | 247 (10.5)   | 458 (30.2)   | 316 (13.1)   |
| Reduced eGFR, n (%)                       | 95 (3.9)           | 141 (2.4)    | 178 (5.1)    | 105 (2.7)    | 89 (21.0)        | 469 (20.2)   | 292 (19.6)   | 404 (16.7)   |
| History of stroke, n (%)                  | 49 (1.9)           | 53 (0.9)     | 181 (4.9)    | 112 (2.7)    | 18 (4.0)         | 55 (2.3)     | 128 (8.1)    | 123 (4.9)    |
| Waist circumference (cm), mean (SD)       | 100.4 (16.0)       | 93.1 (14.8)  | 97.8 (16.7)  | 89.1 (16.2)  | 98.3 (13.0)      | 90.5 (12.3)  | 95.9 (14.5)  | 88.0 (14.6)  |
| SBP (mmHg), mean (SD)                     | 127.9 (21.3)       | 117.0 (17.7) | 127.8 (16.8) | 119.8 (14.9) | 143.9 (24.1)     | 135.5 (21.3) | 132.2 (17.8) | 127.2 (16.1) |
| Taking antihypertensive medication, n (%) | 1,114 (43.9)       | 1,123 (19.0) | 2,214 (61.9) | 1,307 (33.4) | 282 (63.2)       | 908 (38.9)   | 1,109 (72.3) | 1,235 (50.8) |
| Total cholesterol (mg/dL), mean (SD)      | 217.2 (45.9)       | 218.1 (42.2) | 199.4 (40.1) | 204.2 (38.1) | 212.2 (40.6)     | 224.9 (38.0) | 199.0 (41.8) | 200.8 (37.9) |
| HDL cholesterol (mg/dL), mean (SD)        | 58.0 (17.3)        | 57.5 (17.1)  | 56.3 (15.6)  | 57.6 (16.2)  | 61.6 (15.5)      | 59.4 (15.9)  | 58.8 (16.4)  | 58.3 (16.9)  |
| Taking lipid-lowering medications, n (%)  | 37 (1.5)           | 180 (3.0)    | 1,034 (27.7) | 1,048 (25.6) | 31 (7.0)         | 116 (5.0)    | 623 (39.2)   | 930 (36.9)   |
| Health insurance, n (%)                   | 1,938 (76.3)       | 5,629 (95.0) | 3,075 (82.6) | 3,720 (91.0) | NA               | NA           | NA           | NA           |
| Left ventricular hypertrophy, n (%)       | 129 (5.2)          | 52 (0.9)     | 289 (7.9)    | 91 (2.3)     | 41 (9.3)         | 109 (4.7)    | 208 (13.2)   | 156 (6.3)    |
| Atrial fibrillation,† n (%)               | NA                 | NA           | 266 (7.3)    | 219 (5.4)    | 15 (3.4)         | 102 (4.4)    | 85 (5.5)     | 249 (10.1)   |

ARIC: Atherosclerosis Risk In Communities; CHS: Cardiovascular Health Study; eGFR: estimated glomerular filtration rate; HDL: high-density lipoprotein; NA: not applicable; REGARDS: REasons for Geographic And Racial Differences in Stroke; SBP: systolic blood pressure; SD: standard deviation; US: United States.

\* Stroke belt (buckle states) includes coastal North Carolina, South Carolina and Georgia. Stroke belt (non-buckle states) includes the remaining parts of the stroke buckle states and Tennessee, Mississippi, Alabama, Louisiana and Arkansas.

† Data on atrial fibrillation at baseline was not included in the ARIC publicly available dataset.

Colantonio - Racial differences in CHD

**Supplemental table 3.** Incidence rates for fatal, nonfatal and total CHD, and non-CHD mortality among black and white men in ARIC, CHS and REGARDS.

|                             | 45-64 years of age  |                     |                     |                     | ≥65 years of age    |                     |                     |                     |                     |                     |
|-----------------------------|---------------------|---------------------|---------------------|---------------------|---------------------|---------------------|---------------------|---------------------|---------------------|---------------------|
|                             | ARIC                |                     | REGARDS             |                     | CHS                 |                     | REGARDS*            |                     | REGARDS†            |                     |
|                             | Blacks<br>(N=1,534) | Whites<br>(N=4,945) | Blacks<br>(N=2,044) | Whites<br>(N=3,252) | Blacks<br>(N=277)   | Whites<br>(N=1,559) | Blacks<br>(N=997)   | Whites<br>(N=2,384) | Blacks<br>(N=997)   | Whites<br>(N=2,384) |
| <b>Fatal CHD</b>            |                     |                     |                     |                     |                     |                     |                     |                     |                     |                     |
| Events                      | 42                  | 69                  | 39                  | 32                  | 26                  | 119                 | 48                  | 70                  | 48                  | 72                  |
| Incidence rate<br>(95% CI)‡ | 2.8<br>(1.9-3.6)    | 1.4<br>(1.0-1.7)    | 2.8<br>(1.9-3.6)    | 1.3<br>(0.8-1.7)    | 11.7<br>(7.2-16.3)  | 9.1<br>(7.5-10.8)   | 7.0<br>(5.0-9.0)    | 4.1<br>(3.1-5.0)    | 7.1<br>(5.1-9.1)    | 4.2<br>(3.2-5.2)    |
| <b>Nonfatal CHD</b>         |                     |                     |                     |                     |                     |                     |                     |                     |                     |                     |
| Events                      | 77                  | 312                 | 61                  | 111                 | 33                  | 216                 | 35                  | 152                 | 54                  | 184                 |
| Incidence rate<br>(95% CI)‡ | 5.1<br>(3.9-6.2)    | 6.1<br>(5.5-6.8)    | 4.3<br>(3.2-5.4)    | 4.5<br>(3.7-5.3)    | 14.9<br>(9.8-20.0)  | 16.6<br>(14.4-18.8) | 5.1<br>(3.4-6.8)    | 8.9<br>(7.4-10.3)   | 7.9<br>(5.8-10.1)   | 10.8<br>(9.2-12.3)  |
| <b>Total CHD</b>            |                     |                     |                     |                     |                     |                     |                     |                     |                     |                     |
| Events                      | 119                 | 381                 | 100                 | 143                 | 59                  | 335                 | 83                  | 222                 | 102                 | 256                 |
| Incidence rate<br>(95% CI)‡ | 7.9<br>(6.4-9.3)    | 7.5<br>(6.7-8.3)    | 7.1<br>(5.7-8.5)    | 5.8<br>(4.9-6.8)    | 26.7<br>(19.9-33.5) | 25.7<br>(23.0-28.5) | 12.1<br>(9.5-14.7)  | 12.9<br>(11.2-14.6) | 15.0<br>(12.1-17.9) | 15.0<br>(13.2-16.8) |
| <b>Non-CHD death</b>        |                     |                     |                     |                     |                     |                     |                     |                     |                     |                     |
| Deaths                      | 211                 | 344                 | 193                 | 158                 | 107                 | 467                 | 284                 | 544                 | 272                 | 525                 |
| Mortality rate<br>(95% CI)‡ | 13.9<br>(12.1-15.8) | 6.8<br>(6.1-7.5)    | 13.7<br>(11.8-15.6) | 6.4<br>(5.4-7.4)    | 48.3<br>(39.2-57.5) | 35.9<br>(32.6-39.1) | 41.5<br>(36.7-46.3) | 31.7<br>(29.0-34.4) | 40.0<br>(35.3-44.8) | 30.7<br>(28.1-33.4) |

ARIC: Atherosclerosis Risk In Communities; CHD: coronary heart disease; CHS: Cardiovascular Health Study; CI: confidence interval; REGARDS: REasons for Geographic And Racial Differences in Stroke.

\* Using the primary definition of CHD.

† Using the secondary definition of CHD which includes myocardial infarction hospitalizations detected through Medicare claims.

‡ Per 1,000 person-years.

The maximum follow-up for all analyses was 11 years. Mean follow-up was 10.2 years in ARIC, 7.3 years among participants 45-64 years of age in REGARDS, 8.3 years in CHS, and 7.1 years among participants ≥65 years of age in REGARDS when using the primary and secondary definitions of CHD.

Colantonio - Racial differences in CHD

**Supplemental table 4.** Incidence rates for fatal, nonfatal and total CHD, and non-CHD mortality among black and white women in ARIC, CHS and REGARDS.

|                             | 45-64 years of age  |                     |                     |                     | ≥65 years of age    |                     |                     |                     |                     |                     |
|-----------------------------|---------------------|---------------------|---------------------|---------------------|---------------------|---------------------|---------------------|---------------------|---------------------|---------------------|
|                             | ARIC                |                     | REGARDS             |                     | CHS                 |                     | REGARDS*            |                     | REGARDS†            |                     |
|                             | Blacks<br>(N=2,551) | Whites<br>(N=5,937) | Blacks<br>(N=3,729) | Whites<br>(N=4,093) | Blacks<br>(N=448)   | Whites<br>(N=2,342) | Blacks<br>(N=1,590) | Whites<br>(N=2,522) | Blacks<br>(N=1,590) | Whites<br>(N=2,522) |
| <b>Fatal CHD</b>            |                     |                     |                     |                     |                     |                     |                     |                     |                     |                     |
| Events                      | 30                  | 29                  | 36                  | 23                  | 30                  | 115                 | 39                  | 42                  | 37                  | 44                  |
| Incidence rate<br>(95% CI)‡ | 1.1<br>(0.7-1.5)    | 0.5<br>(0.3-0.6)    | 1.4<br>(1.0-1.9)    | 0.8<br>(0.5-1.1)    | 7.2<br>(4.6-9.7)    | 5.2<br>(4.2-6.1)    | 3.6<br>(2.5-4.7)    | 2.3<br>(1.6-3.0)    | 3.4<br>(2.3-4.5)    | 2.5<br>(1.7-3.2)    |
| <b>Nonfatal CHD</b>         |                     |                     |                     |                     |                     |                     |                     |                     |                     |                     |
| Events                      | 92                  | 152                 | 68                  | 60                  | 38                  | 163                 | 44                  | 85                  | 77                  | 115                 |
| Incidence rate<br>(95% CI)‡ | 3.5<br>(2.8-4.2)    | 2.4<br>(2.0-2.8)    | 2.7<br>(2.0-3.3)    | 2.0<br>(1.5-2.5)    | 9.1<br>(6.2-12.0)   | 7.3<br>(6.2-8.5)    | 4.1<br>(2.9-5.3)    | 4.7<br>(3.7-5.7)    | 7.2<br>(5.6-8.8)    | 6.4<br>(5.3-7.6)    |
| <b>Total CHD</b>            |                     |                     |                     |                     |                     |                     |                     |                     |                     |                     |
| Events                      | 122                 | 181                 | 104                 | 83                  | 68                  | 278                 | 83                  | 127                 | 114                 | 159                 |
| Incidence rate<br>(95% CI)‡ | 4.6<br>(3.8-5.5)    | 2.9<br>(2.4-3.3)    | 4.1<br>(3.3-4.9)    | 2.8<br>(2.2-3.4)    | 16.3<br>(12.4-20.1) | 12.5<br>(11.0-14.0) | 7.7<br>(6.0-9.3)    | 7.1<br>(5.8-8.3)    | 10.6<br>(8.7-12.5)  | 8.9<br>(7.5-10.3)   |
| <b>Non-CHD death</b>        |                     |                     |                     |                     |                     |                     |                     |                     |                     |                     |
| Deaths                      | 236                 | 272                 | 225                 | 153                 | 104                 | 537                 | 293                 | 431                 | 271                 | 415                 |
| Mortality rate<br>(95% CI)‡ | 9.0<br>(7.8-10.1)   | 4.3<br>(3.8-4.8)    | 8.8<br>(7.7-10.0)   | 5.2<br>(4.4-6.0)    | 24.9<br>(20.1-29.7) | 24.2<br>(22.1-26.2) | 27.1<br>(24.0-30.2) | 24.0<br>(21.8-26.3) | 25.2<br>(22.2-28.2) | 23.2<br>(21.0-25.4) |

ARIC: Atherosclerosis Risk In Communities; CHD: coronary heart disease; CHS: Cardiovascular Health Study; CI: confidence interval; REGARDS: REasons for Geographic And Racial Differences in Stroke.

\* Using the primary definition of CHD.

† Using the secondary definition of CHD which includes myocardial infarction hospitalizations detected through Medicare claims.

‡ Per 1,000 person-years.

REGARDS study participants ≥65 years of age with incident fatal CHD by the primary definition can have incident nonfatal CHD by the secondary definition if they had a Medicare claim for a myocardial infarction hospitalization >28 days before their death date.

The maximum follow-up for all analyses was 11 years. Mean follow-up was 10.5 years in ARIC, 7.0 years among participants 45-64 years of age in REGARDS, 9.5 years in CHS, and 7.0 among participants ≥65 years of age in REGARDS when using the primary and secondary definition of CHD.

Colantonio - Racial differences in CHD

**Supplemental table 5.** Hazard ratios for fatal, nonfatal and total CHD among black versus white men in ARIC, CHS and REGARDS. Secondary analysis removing competing risk.

|                             | 45-64 years of age |                      | CHS<br>(N=1,836) | ≥65 years of age      |                       |
|-----------------------------|--------------------|----------------------|------------------|-----------------------|-----------------------|
|                             | ARIC<br>(N=6,479)  | REGARDS<br>(N=5,296) |                  | REGARDS*<br>(N=3,381) | REGARDS†<br>(N=3,381) |
| <b>Fatal CHD, events</b>    | <b>111</b>         | <b>71</b>            | <b>145</b>       | <b>118</b>            | <b>120</b>            |
| Hazard ratio (95% CI)       |                    |                      |                  |                       |                       |
| Model 1                     | 2.19 (1.49-3.22)   | 2.17 (1.36-3.46)     | 1.43 (0.93-2.18) | 1.81 (1.25-2.61)      | 1.76 (1.22-2.54)      |
| Model 2                     | 1.94 (1.26-3.00)   | 1.67 (1.02-2.72)     | 1.20 (0.78-1.86) | 1.41 (0.95-2.12)      | 1.36 (0.91-2.04)      |
| Model 3                     | 1.91 (1.23-2.96)   | 1.57 (0.96-2.57)     | 1.15 (0.74-1.80) | 1.38 (0.92-2.05)      | 1.32 (0.89-1.97)      |
| Model 4                     | 1.33 (0.83-2.12)   | 1.16 (0.68-1.95)     | 0.95 (0.60-1.50) | 1.16 (0.76-1.75)      | 1.12 (0.74-1.70)      |
| Model 5                     | 1.24 (0.77-2.01)   | 1.14 (0.67-1.93)     | NA               | NA                    | NA                    |
| Model 6                     | 1.20 (0.74-1.95)   | 1.08 (0.63-1.84)     | 0.90 (0.56-1.43) | 1.19 (0.78-1.82)      | 1.16 (0.76-1.76)      |
| <b>Nonfatal CHD, events</b> | <b>389</b>         | <b>172</b>           | <b>249</b>       | <b>187</b>            | <b>238</b>            |
| Hazard ratio (95% CI)       |                    |                      |                  |                       |                       |
| Model 1                     | 0.87 (0.67-1.11)   | 0.97 (0.71-1.33)     | 0.92 (0.64-1.32) | 0.59 (0.41-0.85)      | 0.76 (0.56-1.03)      |
| Model 2                     | 0.70 (0.54-0.93)   | 0.86 (0.62-1.19)     | 0.90 (0.62-1.31) | 0.61 (0.42-0.90)      | 0.71 (0.52-0.99)      |
| Model 3                     | 0.67 (0.51-0.89)   | 0.82 (0.59-1.13)     | 0.90 (0.62-1.31) | 0.60 (0.41-0.88)      | 0.71 (0.51-0.97)      |
| Model 4                     | 0.65 (0.49-0.87)   | 0.70 (0.50-0.99)     | 0.84 (0.57-1.24) | 0.55 (0.37-0.82)      | 0.65 (0.47-0.91)      |
| Model 5                     | 0.66 (0.49-0.88)   | 0.70 (0.49-0.99)     | NA               | NA                    | NA                    |
| Model 6                     | 0.65 (0.48-0.87)   | 0.68 (0.48-0.96)     | 0.84 (0.57-1.24) | 0.55 (0.37-0.81)      | 0.64 (0.46-0.89)      |
| <b>Total CHD, events</b>    | <b>500</b>         | <b>243</b>           | <b>394</b>       | <b>305</b>            | <b>358</b>            |
| Hazard ratio (95% CI)       |                    |                      |                  |                       |                       |
| Model 1                     | 1.10 (0.90-1.36)   | 1.24 (0.96-1.60)     | 1.09 (0.82-1.43) | 0.97 (0.75-1.24)      | 1.04 (0.82-1.31)      |
| Model 2                     | 0.91 (0.73-1.15)   | 1.05 (0.80-1.37)     | 1.01 (0.76-1.34) | 0.89 (0.68-1.17)      | 0.91 (0.71-1.16)      |
| Model 3                     | 0.88 (0.70-1.11)   | 1.00 (0.76-1.30)     | 1.00 (0.75-1.33) | 0.87 (0.66-1.14)      | 0.89 (0.70-1.14)      |
| Model 4                     | 0.78 (0.61-1.00)   | 0.82 (0.61-1.08)     | 0.89 (0.66-1.19) | 0.77 (0.59-1.03)      | 0.80 (0.62-1.04)      |
| Model 5                     | 0.77 (0.61-0.99)   | 0.81 (0.61-1.08)     | NA               | NA                    | NA                    |
| Model 6                     | 0.76 (0.59-0.97)   | 0.79 (0.59-1.05)     | 0.87 (0.65-1.17) | 0.78 (0.59-1.03)      | 0.80 (0.62-1.04)      |

ARIC: Atherosclerosis Risk In Communities; CHD: coronary heart disease; CHS: Cardiovascular Health Study; CI: confidence interval; NA: not applicable; REGARDS: REasons for Geographic And Racial Differences in Stroke.

\* Using the primary definition of CHD.

† Using the secondary definition of CHD which includes myocardial infarction hospitalizations detected through Medicare claims.

Analyses were conducted using Cox-regression and multiple imputation for missing data. The maximum follow-up for all analyses was 11 years. Mean follow-up was 10.2 years in ARIC, 7.3 years among participants 45-64 years of age in REGARDS, 8.3 years in CHS, and 7.1 years among participants ≥65 years of age in REGARDS when using the primary and secondary definitions of CHD.

Model 1 adjusts for age.

Model 2 adjusts for age, education and income levels (and region of residence in REGARDS).

Model 3 adjusts for covariates in Model 2 plus alcohol consumption, physical activity, waist circumference and current smoking.

Model 4 adjusts for covariates in Model 3 plus diabetes, reduced estimated glomerular filtration rate, stroke, systolic blood pressure, use of antihypertensive medications, total and high-density lipoprotein cholesterol, and use of lipid-lowering medication.

Model 5 adjusts for covariates in Model 4 plus health insurance among participants <65 years of age (all participants ≥65 years of age had Medicare).

Model 6 adjusts for covariates in Model 5 plus left ventricular hypertrophy and atrial fibrillation (except in ARIC).

Colantonio - Racial differences in CHD

**Supplemental table 6.** Hazard ratios for fatal, nonfatal and total CHD among black versus white women in ARIC, CHS and REGARDS. Secondary analysis removing competing risk.

|                             | 45-64 years of age |                      |                  | ≥65 years of age      |                       |
|-----------------------------|--------------------|----------------------|------------------|-----------------------|-----------------------|
|                             | ARIC<br>(N=8,488)  | REGARDS<br>(N=7,822) | CHS<br>(N=2,790) | REGARDS*<br>(N=4,112) | REGARDS†<br>(N=4,112) |
| <b>Fatal CHD, events</b>    | <b>59</b>          | <b>59</b>            | <b>145</b>       | <b>81</b>             | <b>81</b>             |
| Hazard ratios (95% CI)      |                    |                      |                  |                       |                       |
| Model 1                     | 2.77 (1.66-4.61)   | 1.82 (1.08-3.07)     | 1.18 (0.79-1.77) | 1.59 (1.03-2.46)      | 1.43 (0.93-2.22)      |
| Model 2                     | 1.40 (0.81-2.42)   | 1.38 (0.80-2.39)     | 0.95 (0.62-1.44) | 1.39 (0.87-2.22)      | 1.27 (0.80-2.03)      |
| Model 3                     | 1.30 (0.74-2.28)   | 1.07 (0.62-1.86)     | 0.75 (0.49-1.16) | 1.18 (0.73-1.89)      | 1.05 (0.65-1.68)      |
| Model 4                     | 0.77 (0.42-1.42)   | 0.98 (0.55-1.75)     | 0.64 (0.40-1.01) | 1.04 (0.64-1.71)      | 0.96 (0.59-1.57)      |
| Model 5                     | 0.71 (0.38-1.33)   | 0.99 (0.55-1.76)     | NA               | NA                    | NA                    |
| Model 6                     | 0.69 (0.37-1.28)   | 0.97 (0.54-1.74)     | 0.63 (0.40-1.01) | 1.06 (0.65-1.75)      | 0.97 (0.59-1.60)      |
| <b>Nonfatal CHD, events</b> | <b>244</b>         | <b>128</b>           | <b>201</b>       | <b>129</b>            | <b>192</b>            |
| Hazard ratios (95% CI)      |                    |                      |                  |                       |                       |
| Model 1                     | 1.53 (1.18-1.98)   | 1.31 (0.93-1.86)     | 1.19 (0.83-1.69) | 0.87 (0.61-1.26)      | 1.15 (0.86-1.54)      |
| Model 2                     | 1.00 (0.75-1.33)   | 1.04 (0.72-1.51)     | 1.05 (0.73-1.51) | 0.77 (0.53-1.14)      | 0.99 (0.73-1.35)      |
| Model 3                     | 0.94 (0.70-1.26)   | 0.95 (0.66-1.38)     | 0.92 (0.63-1.34) | 0.69 (0.46-1.02)      | 0.91 (0.66-1.24)      |
| Model 4                     | 0.73 (0.53-0.99)   | 0.74 (0.50-1.09)     | 0.89 (0.60-1.32) | 0.67 (0.44-1.00)      | 0.84 (0.60-1.16)      |
| Model 5                     | 0.70 (0.51-0.96)   | 0.74 (0.50-1.09)     | NA               | NA                    | NA                    |
| Model 6                     | 0.69 (0.50-0.95)   | 0.69 (0.47-1.03)     | 0.88 (0.59-1.31) | 0.68 (0.45-1.03)      | 0.86 (0.62-1.20)      |
| <b>Total CHD, events</b>    | <b>303</b>         | <b>187</b>           | <b>346</b>       | <b>210</b>            | <b>273</b>            |
| Hazard ratios (95% CI)      |                    |                      |                  |                       |                       |
| Model 1                     | 1.72 (1.37-2.17)   | 1.45 (1.09-1.94)     | 1.19 (0.91-1.56) | 1.11 (0.84-1.46)      | 1.23 (0.97-1.57)      |
| Model 2                     | 1.07 (0.83-1.38)   | 1.14 (0.84-1.54)     | 1.02 (0.77-1.34) | 0.98 (0.73-1.31)      | 1.07 (0.83-1.38)      |
| Model 3                     | 1.00 (0.77-1.30)   | 0.98 (0.72-1.34)     | 0.86 (0.65-1.14) | 0.85 (0.63-1.15)      | 0.95 (0.73-1.23)      |
| Model 4                     | 0.73 (0.56-0.97)   | 0.81 (0.59-1.12)     | 0.79 (0.58-1.06) | 0.80 (0.59-1.09)      | 0.88 (0.67-1.15)      |
| Model 5                     | 0.70 (0.53-0.93)   | 0.81 (0.59-1.12)     | NA               | NA                    | NA                    |
| Model 6                     | 0.68 (0.51-0.91)   | 0.77 (0.56-1.07)     | 0.78 (0.58-1.06) | 0.82 (0.60-1.12)      | 0.89 (0.68-1.18)      |

ARIC: Atherosclerosis Risk In Communities; CHD: coronary heart disease; CHS: Cardiovascular Health Study; CI: confidence interval; NA: not applicable; REGARDS: REasons for Geographic And Racial Differences in Stroke.

\* Using the primary definition of CHD.

† Using the secondary definition of CHD which includes myocardial infarction hospitalizations detected through Medicare claims.

Analyses were conducted using Cox-regression and multiple imputation for missing data. The maximum follow-up for all analyses was 11 years. Mean follow-up was 10.5 years in ARIC, 7.0 years among participants 45-64 years of age in REGARDS, 9.5 years in CHS, and 7.0 years among participants ≥65 years of age in REGARDS when using the primary and secondary definition of CHD.

Model 1 adjusts for age.

Model 2 adjusts for age, education and income levels (and region of residence in REGARDS).

Model 3 adjusts for covariates in Model 2 plus alcohol consumption, physical activity, waist circumference and current smoking.

Model 4 adjusts for covariates in Model 3 plus diabetes, reduced estimated glomerular filtration rate, stroke, systolic blood pressure, use of antihypertensive medications, total and high-density lipoprotein cholesterol, and use of lipid-lowering medication.

Model 5 adjusts for covariates in Model 4 plus health insurance among participants <65 years of age (all participants ≥65 years of age had Medicare).

Model 6 adjusts for covariates in Model 5 plus left ventricular hypertrophy and atrial fibrillation (except in ARIC).



Colantonio - Racial differences in CHD

**Supplemental table 7.** Hazard ratios for fatal, nonfatal and total CHD among black versus white men in ARIC and CHS. Secondary analysis using all available follow-up.

|                                  | 45-64 years of age<br>ARIC<br>(N=6,479) | ≥65 years of age<br>CHS<br>(N=1,836) |
|----------------------------------|-----------------------------------------|--------------------------------------|
| <b>Fatal CHD, events</b>         | <b>141</b>                              | <b>252</b>                           |
| Incidence rate, blacks (95% CI)* | 3.6 (2.6-4.5)                           | 13.7 (9.3-18.0)                      |
| Incidence rate, whites (95% CI)* | 1.7 (1.4-2.1)                           | 12.2 (10.6-13.8)                     |
| Hazard ratio (95% CI)            |                                         |                                      |
| Model 1                          | 2.16 (1.54-3.03)                        | 1.06 (0.75-1.50)                     |
| Model 2                          | 1.72 (1.18-2.51)                        | 0.99 (0.69-1.41)                     |
| Model 3                          | 1.67 (1.15-2.42)                        | 0.99 (0.69-1.41)                     |
| Model 4                          | 1.21 (0.80-1.83)                        | 0.92 (0.64-1.33)                     |
| Model 5                          | 1.14 (0.74-1.75)                        | NA                                   |
| Model 6                          | 1.12 (0.73-1.73)                        | 0.90 (0.62-1.31)                     |
| <b>Nonfatal CHD, events</b>      | <b>486</b>                              | <b>356</b>                           |
| Incidence rate, blacks (95% CI)* | 6.5 (5.2-7.8)                           | 16.9 (12.1-21.7)                     |
| Incidence rate, whites (95% CI)* | 7.6 (6.9-8.4)                           | 17.6 (15.6-19.6)                     |
| Hazard ratio (95% CI)            |                                         |                                      |
| Model 1                          | 0.84 (0.68-1.05)                        | 0.84 (0.62-1.13)                     |
| Model 2                          | 0.71 (0.55-0.91)                        | 0.85 (0.62-1.16)                     |
| Model 3                          | 0.69 (0.54-0.88)                        | 0.87 (0.64-1.19)                     |
| Model 4                          | 0.68 (0.52-0.88)                        | 0.87 (0.63-1.19)                     |
| Model 5                          | 0.68 (0.52-0.88)                        | NA                                   |
| Model 6                          | 0.67 (0.51-0.87)                        | 0.87 (0.63-1.20)                     |
| <b>Total CHD, events</b>         | <b>627</b>                              | <b>608</b>                           |
| Incidence rate, blacks (95% CI)* | 10.1 (8.5-10.2)                         | 29.8 (27.3-32.4)                     |
| Incidence rate, whites (95% CI)* | 9.3 (8.5-11.7)                          | 30.6 (24.1-37.1)                     |
| Hazard ratio (95% CI)            |                                         |                                      |
| Model 1                          | 1.08 (0.90-1.29)                        | 0.93 (0.74-1.17)                     |
| Model 2                          | 0.89 (0.73-1.09)                        | 0.90 (0.71-1.15)                     |
| Model 3                          | 0.86 (0.70-1.06)                        | 0.91 (0.72-1.16)                     |
| Model 4                          | 0.77 (0.62-0.96)                        | 0.88 (0.69-1.12)                     |
| Model 5                          | 0.76 (0.61-0.94)                        | NA                                   |
| Model 6                          | 0.75 (0.60-0.93)                        | 0.87 (0.68-1.11)                     |

ARIC: Atherosclerosis Risk In Communities; CHD: coronary heart disease; CHS: Cardiovascular Health Study; CI: confidence interval; NA: not applicable.

\* Per 1,000 person-years.

Analyses were conducted using competing risk regression and multiple imputation for missing data. Mean (maximum) follow-up was 12.1 (15.1) years in ARIC, and 11.1 (21.5) years in CHS.

Model 1 adjusts for age.

Model 2 adjusts for age, and education and income levels.

Model 3 adjusts for covariates in Model 2 plus alcohol consumption, physical activity, waist circumference and current smoking.

Model 4 adjusts for covariates in Model 3 plus diabetes, reduced estimated glomerular filtration rate, stroke, systolic blood pressure, use of antihypertensive medications, total and high-density lipoprotein cholesterol, and use of lipid-lowering medication.

Model 5 adjusts for covariates in Model 4 plus health insurance among participants <65 years of age in ARIC (all participants ≥65 years of age in CHS had Medicare).

Model 6 adjusts for covariates in Model 5 plus left ventricular hypertrophy and atrial fibrillation (except in ARIC).

Colantonio - Racial differences in CHD

**Supplemental table 8.** Hazard ratios for fatal, nonfatal and total CHD among black versus white women in ARIC and CHS. Secondary analysis using all available follow-up.

|                                  | <b>45-64 years of age<br/>ARIC<br/>(N=8,488)</b> | <b>≥65 years of age<br/>CHS<br/>(N=2,790)</b> |
|----------------------------------|--------------------------------------------------|-----------------------------------------------|
| <b>Fatal CHD, events</b>         | <b>81</b>                                        | <b>320</b>                                    |
| Incidence rate, blacks (95% CI)* | 1.4 (0.9-1.8)                                    | 10.0 (7.4-12.5)                               |
| Incidence rate, whites (95% CI)* | 0.7 (0.5-0.9)                                    | 8.1 (7.1-9.1)                                 |
| Hazard ratio (95% CI)            |                                                  |                                               |
| Model 1                          | 2.03 (1.31-3.13)                                 | 1.12 (0.84-1.50)                              |
| Model 2                          | 1.19 (0.76-1.85)                                 | 1.04 (0.77-1.40)                              |
| Model 3                          | 1.12 (0.70-1.79)                                 | 0.91 (0.67-1.25)                              |
| Model 4                          | 0.66 (0.39-1.12)                                 | 0.83 (0.60-1.15)                              |
| Model 5                          | 0.63 (0.37-1.06)                                 | NA                                            |
| Model 6                          | 0.60 (0.35-1.02)                                 | 0.83 (0.60-1.15)                              |
| <b>Nonfatal CHD, events</b>      | <b>317</b>                                       | <b>338</b>                                    |
| Incidence rate, blacks (95% CI)* | 4.3 (3.5-5.1)                                    | 9.4 (6.9-11.9)                                |
| Incidence rate, whites (95% CI)* | 3.2 (2.8-3.7)                                    | 8.8 (7.7-9.8)                                 |
| Hazard ratio (95% CI)            |                                                  |                                               |
| Model 1                          | 1.37 (1.09-1.73)                                 | 1.04 (0.78-1.40)                              |
| Model 2                          | 1.00 (0.77-1.31)                                 | 0.99 (0.73-1.33)                              |
| Model 3                          | 0.94 (0.72-1.24)                                 | 0.94 (0.70-1.27)                              |
| Model 4                          | 0.76 (0.57-1.01)                                 | 0.98 (0.72-1.35)                              |
| Model 5                          | 0.74 (0.55-0.99)                                 | NA                                            |
| Model 6                          | 0.73 (0.55-0.98)                                 | 0.97 (0.71-1.33)                              |
| <b>Total CHD, events</b>         | <b>398</b>                                       | <b>658</b>                                    |
| Incidence rate, blacks (95% CI)* | 5.7 (4.8-6.6)                                    | 19.4 (15.8-23.0)                              |
| Incidence rate, whites (95% CI)* | 3.9 (3.5-4.4)                                    | 16.9 (15.4-18.3)                              |
| Hazard ratio (95% CI)            |                                                  |                                               |
| Model 1                          | 1.47 (1.20-1.80)                                 | 1.11 (0.90-1.36)                              |
| Model 2                          | 1.02 (0.81-1.29)                                 | 1.03 (0.83-1.27)                              |
| Model 3                          | 0.96 (0.76-1.22)                                 | 0.94 (0.75-1.16)                              |
| Model 4                          | 0.72 (0.56-0.92)                                 | 0.91 (0.72-1.14)                              |
| Model 5                          | 0.69 (0.54-0.90)                                 | NA                                            |
| Model 6                          | 0.68 (0.53-0.88)                                 | 0.90 (0.72-1.13)                              |

ARIC: Atherosclerosis Risk In Communities; CHD: coronary heart disease; CHS: Cardiovascular Health Study; CI: confidence interval; NA: not applicable.

\* Per 1,000 person-years.

Analyses were conducted using competing risk regression and multiple imputation for missing data. Mean (maximum) follow-up was 12.6 (15.1) years in ARIC, and 13.7 (21.5) years in CHS.

Model 1 adjusts for age.

Model 2 adjusts for age, and education and income levels.

Model 3 adjusts for covariates in Model 2 plus alcohol consumption, physical activity, waist circumference and current smoking.

Model 4 adjusts for covariates in Model 3 plus diabetes, reduced estimated glomerular filtration rate, stroke, systolic blood pressure, use of antihypertensive medications, total and high-density lipoprotein cholesterol, and use of lipid-lowering medication.

Model 5 adjusts for covariates in Model 4 plus health insurance among participants <65 years of age in ARIC (all participants ≥65 years of age in CHS had Medicare).

Model 6 adjusts for covariates in Model 5 plus left ventricular hypertrophy and atrial fibrillation (except in ARIC).

Colantonio - Racial differences in CHD

**Supplemental table 9.** Hazard ratios for fatal, nonfatal and total CHD among black versus white men in ARIC and CHS. Secondary analysis including incident unrecognized myocardial infarctions in the definition of incident nonfatal CHD.

|                                  | <b>45-64 years of age<br/>ARIC<br/>(N=6,479)</b> | <b>≥65 years of age<br/>CHS<br/>(N=1,836)</b> |
|----------------------------------|--------------------------------------------------|-----------------------------------------------|
| <b>Fatal CHD, events</b>         | <b>106</b>                                       | <b>139</b>                                    |
| Incidence rate, blacks (95% CI)* | 2.7 (1.8-3.5)                                    | 11.8 (7.2-16.3)                               |
| Incidence rate, whites (95% CI)* | 1.3 (1.0-1.6)                                    | 8.8 (7.2-10.4)                                |
| Hazard ratio (95% CI)            |                                                  |                                               |
| Model 1                          | 2.07 (1.39-3.07)                                 | 1.39 (0.90-2.14)                              |
| Model 2                          | 1.84 (1.21-2.80)                                 | 1.26 (0.81-1.96)                              |
| Model 3                          | 1.82 (1.20-2.75)                                 | 1.27 (0.82-1.97)                              |
| Model 4                          | 1.27 (0.79-2.02)                                 | 1.10 (0.69-1.75)                              |
| Model 5                          | 1.18 (0.72-1.93)                                 | NA                                            |
| Model 6                          | 1.16 (0.71-1.89)                                 | 1.07 (0.68-1.70)                              |
| <b>Nonfatal CHD, events</b>      | <b>452</b>                                       | <b>284</b>                                    |
| Incidence rate, blacks (95% CI)* | 6.2 (5.0-7.5)                                    | 14.9 (9.8-20.0)                               |
| Incidence rate, whites (95% CI)* | 7.1 (6.3-7.8)                                    | 19.5 (17.1-21.9)                              |
| Hazard ratio (95% CI)            |                                                  |                                               |
| Model 1                          | 0.87 (0.69-1.09)                                 | 0.72 (0.50-1.04)                              |
| Model 2                          | 0.75 (0.58-0.97)                                 | 0.71 (0.49-1.03)                              |
| Model 3                          | 0.73 (0.56-0.94)                                 | 0.70 (0.48-1.02)                              |
| Model 4                          | 0.67 (0.51-0.89)                                 | 0.66 (0.45-0.96)                              |
| Model 5                          | 0.67 (0.51-0.89)                                 | NA                                            |
| Model 6                          | 0.66 (0.50-0.88)                                 | 0.66 (0.45-0.97)                              |
| <b>Total CHD, events</b>         | <b>558</b>                                       | <b>423</b>                                    |
| Incidence rate, blacks (95% CI)* | 8.9 (7.4-10.4)                                   | 26.7 (19.9-33.5)                              |
| Incidence rate, whites (95% CI)* | 8.4 (7.6-9.2)                                    | 28.3 (25.4-31.2)                              |
| Hazard ratio (95% CI)            |                                                  |                                               |
| Model 1                          | 1.06 (0.87-1.29)                                 | 0.92 (0.70-1.22)                              |
| Model 2                          | 0.92 (0.74-1.14)                                 | 0.87 (0.66-1.16)                              |
| Model 3                          | 0.89 (0.71-1.10)                                 | 0.86 (0.65-1.15)                              |
| Model 4                          | 0.77 (0.61-0.97)                                 | 0.78 (0.58-1.05)                              |
| Model 5                          | 0.75 (0.60-0.96)                                 | NA                                            |
| Model 6                          | 0.74 (0.58-0.94)                                 | 0.77 (0.58-1.04)                              |

ARIC: Atherosclerosis Risk In Communities; CHD: coronary heart disease; CHS: Cardiovascular Health Study; CI: confidence interval; NA: not applicable.

\* Per 1,000 person-years.

Analyses were conducted using competing risk regression and multiple imputation for missing data. The maximum follow-up for all analyses was 11 years. Mean follow-up was 10.2 years in ARIC, and 8.3 years in CHS.

Model 1 adjusts for age.

Model 2 adjusts for age, and education and income levels.

Model 3 adjusts for covariates in Model 2 plus alcohol consumption, physical activity, waist circumference and current smoking.

Model 4 adjusts for covariates in Model 3 plus diabetes, reduced estimated glomerular filtration rate, stroke, systolic blood pressure, use of antihypertensive medications, total and high-density lipoprotein cholesterol, and use of lipid-lowering medication.

Model 5 adjusts for covariates in Model 4 plus health insurance among participants <65 years of age in ARIC (all participants ≥65 years of age in CHS had Medicare).

Model 6 adjusts for covariates in Model 5 plus left ventricular hypertrophy and atrial fibrillation (except in ARIC).

**Supplemental table 10.** Hazard ratios for fatal, nonfatal and total CHD among black versus white women in ARIC and CHS. Secondary analysis including incident unrecognized myocardial infarctions in the definition of incident nonfatal CHD.

|                                  | <b>45-64 years of age<br/>ARIC<br/>(N=8,488)</b> | <b>≥65 years of age<br/>CHS<br/>(N=2,790)</b> |
|----------------------------------|--------------------------------------------------|-----------------------------------------------|
| <b>Fatal CHD, events</b>         | <b>57</b>                                        | <b>140</b>                                    |
| Incidence rate, blacks (95% CI)* | 1.1 (0.7-1.5)                                    | 7.0 (4.4-9.5)                                 |
| Incidence rate, whites (95% CI)* | 0.5 (0.3-0.6)                                    | 5.0 (4.1-6.0)                                 |
| Hazard ratio (95% CI)            |                                                  |                                               |
| Model 1                          | 2.44 (1.45-4.09)                                 | 1.22 (0.81-1.85)                              |
| Model 2                          | 1.30 (0.77-2.18)                                 | 1.01 (0.66-1.57)                              |
| Model 3                          | 1.21 (0.69-2.11)                                 | 0.82 (0.52-1.28)                              |
| Model 4                          | 0.74 (0.40-1.37)                                 | 0.75 (0.46-1.21)                              |
| Model 5                          | 0.69 (0.37-1.27)                                 | NA                                            |
| Model 6                          | 0.63 (0.33-1.20)                                 | 0.75 (0.46-1.22)                              |
| <b>Nonfatal CHD, events</b>      | <b>280</b>                                       | <b>228</b>                                    |
| Incidence rate, blacks (95% CI)* | 4.0 (3.2-4.7)                                    | 10.1 (7.0-13.1)                               |
| Incidence rate, whites (95% CI)* | 2.8 (2.4-3.2)                                    | 8.4 (7.2-9.6)                                 |
| Hazard ratio (95% CI)            |                                                  |                                               |
| Model 1                          | 1.44 (1.13-1.83)                                 | 1.16 (0.84-1.62)                              |
| Model 2                          | 0.99 (0.75-1.30)                                 | 1.03 (0.73-1.45)                              |
| Model 3                          | 0.93 (0.70-1.24)                                 | 0.94 (0.66-1.34)                              |
| Model 4                          | 0.74 (0.55-1.00)                                 | 0.91 (0.63-1.32)                              |
| Model 5                          | 0.72 (0.53-0.97)                                 | NA                                            |
| Model 6                          | 0.70 (0.52-0.95)                                 | 0.90 (0.62-1.30)                              |
| <b>Total CHD, events</b>         | <b>337</b>                                       | <b>368</b>                                    |
| Incidence rate, blacks (95% CI)* | 5.0 (4.2-5.9)                                    | 17.1 (13.1-21.0)                              |
| Incidence rate, whites (95% CI)* | 3.3 (2.8-3.7)                                    | 13.5 (11.9-15.0)                              |
| Hazard ratio (95% CI)            |                                                  |                                               |
| Model 1                          | 1.59 (1.27-1.98)                                 | 1.20 (0.93-1.55)                              |
| Model 2                          | 1.04 (0.81-1.33)                                 | 1.04 (0.79-1.35)                              |
| Model 3                          | 0.98 (0.76-1.26)                                 | 0.89 (0.68-1.18)                              |
| Model 4                          | 0.74 (0.56-0.96)                                 | 0.85 (0.63-1.13)                              |
| Model 5                          | 0.70 (0.53-0.92)                                 | NA                                            |
| Model 6                          | 0.68 (0.52-0.90)                                 | 0.84 (0.63-1.13)                              |

ARIC: Atherosclerosis Risk In Communities; CHD: coronary heart disease; CHS: Cardiovascular Health Study; CI: confidence interval; NA: not applicable.

\* Per 1,000 person-years.

Analyses were conducted using competing risk regression and multiple imputation for missing data. The maximum follow-up for all analyses was 11 years. Mean follow-up was 10.5 years in ARIC, and 9.5 years in CHS.

Model 1 adjusts for age.

Model 2 adjusts for age, and education and income levels.

Model 3 adjusts for covariates in Model 2 plus alcohol consumption, physical activity, waist circumference and current smoking.

Model 4 adjusts for covariates in Model 3 plus diabetes, reduced estimated glomerular filtration rate, stroke, systolic blood pressure, use of antihypertensive medications, total and high-density lipoprotein cholesterol, and use of lipid-lowering medication.

Model 5 adjusts for covariates in Model 4 plus health insurance among participants <65 years of age in ARIC (all participants ≥65 years of age in CHS had Medicare).

Model 6 adjusts for covariates in Model 5 plus left ventricular hypertrophy and atrial fibrillation (except in ARIC).

**Supplemental table 11.** Hazard ratios for out-of-hospital and post-admission fatal CHD among black versus white men in REGARDS.

|                                          | 45-64 years of age   | ≥65 years of age      |                       |
|------------------------------------------|----------------------|-----------------------|-----------------------|
|                                          | REGARDS<br>(N=5,296) | REGARDS*<br>(N=3,381) | REGARDS†<br>(N=3,381) |
| <b>Out-of-hospital fatal CHD, events</b> | <b>50</b>            | <b>66</b>             | <b>65</b>             |
| Incidence rate, blacks (95% CI)‡         | 2.0 (1.3-2.7)        | 3.8 (2.3-5.3)         | 3.7 (2.2-5.1)         |
| Incidence rate, whites (95% CI)‡         | 0.9 (0.5-1.3)        | 2.3 (1.6-3.1)         | 2.3 (1.6-3.1)         |
| Hazard ratio (95% CI)                    |                      |                       |                       |
| Model 1                                  | 2.21 (1.26-3.87)     | 1.60 (0.98-2.62)      | 1.54 (0.93-2.54)      |
| Model 2                                  | 1.69 (0.95-3.00)     | 1.16 (0.70-1.94)      | 1.09 (0.65-1.82)      |
| Model 3                                  | 1.60 (0.89-2.88)     | 1.16 (0.70-1.92)      | 1.09 (0.66-1.80)      |
| Model 4                                  | 1.20 (0.62-2.29)     | 0.99 (0.59-1.64)      | 0.94 (0.56-1.58)      |
| Model 5                                  | 1.18 (0.61-2.28)     | NA                    | NA                    |
| Model 6                                  | 1.15 (0.60-2.22)     | 1.06 (0.62-1.79)      | 1.00 (0.58-1.70)      |
| <b>Post-admission fatal CHD, events</b>  | <b>21</b>            | <b>52</b>             | <b>55</b>             |
| Incidence rate, blacks (95% CI)‡         | 0.8 (0.3-1.2)        | 3.2 (1.9-4.6)         | 3.4 (2.0-4.8)         |
| Incidence rate, whites (95% CI)‡         | 0.4 (0.2-0.7)        | 1.7 (1.1-2.4)         | 1.9 (1.2-2.5)         |
| Hazard ratio (95% CI)                    |                      |                       |                       |
| Model 1                                  | 1.88 (0.79-4.47)     | 1.84 (1.06-3.19)      | 1.80 (1.05-3.07)      |
| Model 2                                  | 1.57 (0.63-3.91)     | 1.69 (0.94-3.01)      | 1.66 (0.94-2.94)      |
| Model 3                                  | 1.46 (0.58-3.70)     | 1.63 (0.93-2.88)      | 1.59 (0.91-2.77)      |
| Model 4                                  | 1.09 (0.36-3.34)     | 1.40 (0.77-2.55)      | 1.42 (0.77-2.60)      |
| Model 5                                  | 1.08 (0.36-3.26)     | NA                    | NA                    |
| Model 6                                  | 1.02 (0.34-3.11)     | 1.39 (0.76-2.54)      | 1.40 (0.76-2.57)      |

CHD: coronary heart disease; CI: confidence interval; NA: not applicable; REGARDS: REasons for Geographic And Racial Differences in Stroke.

\* Using the primary definition of CHD.

† Using the secondary definition of CHD which includes myocardial infarction hospitalizations detected through Medicare claims.

‡ Per 1,000 person-years.

Analyses were conducted using competing risk regression and multiple imputation for missing data. Hazard ratios for out-of-hospital fatal CHD account for competing risk due to post-admission fatal CHD, nonfatal CHD and non-CHD death. Hazard ratios for post-admission fatal CHD account for competing risk due to out-of-hospital fatal CHD, nonfatal CHD and non-CHD death. The maximum follow-up for all analyses was 11 years. Mean follow-up was 7.3 years among participants 45-64 years of age in REGARDS, and 7.1 years among participants ≥65 years of age in REGARDS when using the primary and secondary definitions of CHD.

Model 1 adjusts for age.

Model 2 adjusts for age, education and income levels and region of residence.

Model 3 adjusts for covariates in Model 2 plus alcohol consumption, physical activity, waist circumference and current smoking.

Model 4 adjusts for covariates in Model 3 plus diabetes, reduced estimated glomerular filtration rate, stroke, systolic blood pressure, use of antihypertensive medications, total and high-density lipoprotein cholesterol, and use of lipid-lowering medication.

Model 5 adjusts for covariates in Model 4 plus health insurance among participants <65 years of age (all participants ≥65 years of age had Medicare).

Model 6 adjusts for covariates in Model 5 plus left ventricular hypertrophy and atrial fibrillation.

**Supplemental table 12.** Hazard ratios for out-of-hospital and post-admission fatal CHD among black versus white women in REGARDS.

|                                          | 45-64 years of age   | ≥65 years of age      |                       |
|------------------------------------------|----------------------|-----------------------|-----------------------|
|                                          | REGARDS<br>(N=5,296) | REGARDS*<br>(N=3,381) | REGARDS†<br>(N=3,381) |
| <b>Out-of-hospital fatal CHD, events</b> | <b>38</b>            | <b>45</b>             | <b>43</b>             |
| Incidence rate, blacks (95% CI)‡         | 1.0 (0.6-1.4)        | 1.8 (1.0-2.5)         | 1.7 (0.9-2.4)         |
| Incidence rate, whites (95% CI)‡         | 0.4 (0.2-0.7)        | 1.4 (0.9-2.0)         | 1.4 (0.9-1.9)         |
| Hazard ratio (95% CI)                    |                      |                       |                       |
| Model 1                                  | 2.18 (1.11-4.29)     | 1.23 (0.68-2.23)      | 1.21 (0.66-2.23)      |
| Model 2                                  | 1.70 (0.82-3.51)     | 1.15 (0.59-2.22)      | 1.16 (0.59-2.28)      |
| Model 3                                  | 1.30 (0.63-2.66)     | 1.03 (0.55-1.95)      | 1.04 (0.54-2.00)      |
| Model 4                                  | 1.26 (0.58-2.78)     | 0.91 (0.47-1.78)      | 0.94 (0.48-1.85)      |
| Model 5                                  | 1.27 (0.58-2.80)     | NA                    | NA                    |
| Model 6                                  | 1.27 (0.57-2.82)     | 0.91 (0.46-1.79)      | 0.95 (0.48-1.89)      |
| <b>Post-admission fatal CHD, events</b>  | <b>21</b>            | <b>36</b>             | <b>38</b>             |
| Incidence rate, blacks (95% CI)‡         | 0.4 (0.2-0.7)        | 1.8 (1.0-2.7)         | 1.8 (1.0-2.5)         |
| Incidence rate, whites (95% CI)‡         | 0.3 (0.1-0.5)        | 0.9 (0.5-1.3)         | 1.1 (0.6-1.5)         |
| Hazard ratio (95% CI)                    |                      |                       |                       |
| Model 1                                  | 1.27 (0.54-2.99)     | 2.10 (1.09-4.07)      | 1.66 (0.88-3.14)      |
| Model 2                                  | 0.97 (0.41-2.33)     | 1.73 (0.83-3.59)      | 1.38 (0.67-2.84)      |
| Model 3                                  | 0.79 (0.32-1.94)     | 1.41 (0.69-2.86)      | 1.08 (0.53-2.20)      |
| Model 4                                  | 0.68 (0.27-1.71)     | 1.27 (0.59-2.74)      | 1.01 (0.47-2.14)      |
| Model 5                                  | 0.68 (0.27-1.72)     | NA                    | NA                    |
| Model 6                                  | 0.66 (0.26-1.70)     | 1.32 (0.59-2.95)      | 0.61 (0.24-1.56)      |

CHD: coronary heart disease; CI: confidence interval; NA: not applicable; REGARDS: REasons for Geographic And Racial Differences in Stroke.

\* Using the primary definition of CHD.

† Using the secondary definition of CHD which includes myocardial infarction hospitalizations detected through Medicare claims.

‡ Per 1,000 person-years.

Analyses were conducted using competing risk regression and multiple imputation for missing data. Hazard ratios for out-of-hospital fatal CHD account for competing risk due to post-admission fatal CHD, nonfatal CHD and non-CHD death. Hazard ratios for post-admission fatal CHD account for competing risk due to out-of-hospital fatal CHD, nonfatal CHD and non-CHD death. The mean (maximum) follow-up for all analyses was 7.0 (11) years.

Model 1 adjusts for age.

Model 2 adjusts for age, education and income levels and region of residence.

Model 3 adjusts for covariates in Model 2 plus alcohol consumption, physical activity, waist circumference and current smoking.

Model 4 adjusts for covariates in Model 3 plus diabetes, reduced estimated glomerular filtration rate, stroke, systolic blood pressure, use of antihypertensive medications, total and high-density lipoprotein cholesterol, and use of lipid-lowering medication.

Model 5 adjusts for covariates in Model 4 plus health insurance among participants <65 years of age (all participants ≥65 years of age had Medicare).

Model 6 adjusts for covariates in Model 5 plus left ventricular hypertrophy and atrial fibrillation.

**Supplemental table 13.** Case-fatality among black versus white men with incident CHD in ARIC and CHS. Secondary analysis using all available follow-up.

|                                       | 45-64 years of age<br>ARIC | ≥65 years of age<br>CHS |
|---------------------------------------|----------------------------|-------------------------|
| Case-fatality (fatal CHD / total CHD) |                            |                         |
| Blacks                                | 35.3% (54 / 153)           | 44.7% (38 / 85)         |
| Whites                                | 18.4% (87 / 474)           | 40.1 % (214 / 523)      |
| Case-fatality ratio (95% CI)*         |                            |                         |
| Model 1                               | 1.97 (1.49-2.62)           | 1.11 (0.86-1.43)        |
| Model 2                               | 1.88 (1.36-2.61)           | 1.07 (0.83-1.38)        |
| Model 3                               | 1.89 (1.36-2.63)           | 1.05 (0.81-1.36)        |
| Model 4                               | 1.52 (1.06-2.19)           | 1.00 (0.76-1.32)        |
| Model 5                               | 1.48 (1.02-2.16)           | NA                      |
| Model 6                               | 1.48 (1.01-2.15)           | 0.99 (0.75-1.30)        |

ARIC: Atherosclerosis Risk In Communities; CHD: coronary heart disease; CHS: Cardiovascular Health Study; CI: confidence interval; NA: not applicable.

\* Case-fatality ratios were calculated comparing blacks versus whites (reference group).

Analyses were conducted using multiple imputation for missing data.

Model 1 adjusts for age.

Model 2 adjusts for age, and education and income levels.

Model 3 adjusts for covariates in Model 2 plus alcohol consumption, physical activity, waist circumference and current smoking.

Model 4 adjusts for covariates in Model 3 plus diabetes, reduced estimated glomerular filtration rate, stroke, systolic blood pressure, use of antihypertensive medications, total and high-density lipoprotein cholesterol, and use of lipid-lowering medication.

Model 5 adjusts for covariates in Model 4 plus health insurance among participants <65 years of age in ARIC (all participants ≥65 years of age in CHS had Medicare).

Model 6 adjusts for covariates in Model 5 plus left ventricular hypertrophy and atrial fibrillation (except in ARIC).

Colantonio - Racial differences in CHD

**Supplemental table 14.** Case-fatality among black versus white women with incident CHD in ARIC and CHS. Secondary analysis using all available follow-up.

|                                       | 45-64 years of age<br>ARIC | ≥65 years of age<br>CHS |
|---------------------------------------|----------------------------|-------------------------|
| Case-fatality (fatal CHD / total CHD) |                            |                         |
| Blacks                                | 24.2% (36 / 149)           | 51.4 % (57 / 111)       |
| Whites                                | 18.1% (45 / 249)           | 48.1% (263 / 547)       |
| Case-fatality ratio (95% CI)*         |                            |                         |
| Model 1                               | 1.35 (0.92-1.99)           | 1.02 (0.83-1.25)        |
| Model 2                               | 1.12 (0.76-1.65)           | 1.01 (0.82-1.25)        |
| Model 3                               | 1.16 (0.77-1.73)           | 0.98 (0.79-1.21)        |
| Model 4                               | 0.90 (0.59-1.36)           | 0.92 (0.74-1.15)        |
| Model 5                               | 0.90 (0.59-1.39)           | NA                      |
| Model 6                               | 0.89 (0.57-1.38)           | 0.92 (0.74-1.16)        |

ARIC: Atherosclerosis Risk In Communities; CHD: coronary heart disease; CHS: Cardiovascular Health Study; CI: confidence interval; NA: not applicable.

\* Case-fatality ratios were calculated comparing blacks versus whites (reference group).

Analyses were conducted using multiple imputation for missing data.

Model 1 adjusts for age.

Model 2 adjusts for age, and education and income levels.

Model 3 adjusts for covariates in Model 2 plus alcohol consumption, physical activity, waist circumference and current smoking.

Model 4 adjusts for covariates in Model 3 plus diabetes, reduced estimated glomerular filtration rate, stroke, systolic blood pressure, use of antihypertensive medications, total and high-density lipoprotein cholesterol, and use of lipid-lowering medication.

Model 5 adjusts for covariates in Model 4 plus health insurance among participants <65 years of age in ARIC (all participants ≥65 years of age in CHS had Medicare).

Model 6 adjusts for covariates in Model 5 plus left ventricular hypertrophy and atrial fibrillation (except in ARIC).



**Supplemental table 15.** Case-fatality among black versus white men with incident CHD in ARIC and CHS. Secondary analysis including incident unrecognized myocardial infarctions in the definition of incident nonfatal CHD.

|                                       | 45-64 years of age<br>ARIC | ≥65 years of age<br>CHS |
|---------------------------------------|----------------------------|-------------------------|
| Case-fatality (fatal CHD / total CHD) |                            |                         |
| Blacks                                | 29.9% (40 / 134)           | 44.1% (26 / 59)*        |
| Whites                                | 15.6% (66 / 424)           | 31.0% (113 / 364)       |
| Case-fatality ratio (95% CI)†         |                            |                         |
| Model 1                               | 1.92 (1.37-2.70)           | 1.45 (1.06-2.00)        |
| Model 2                               | 1.96 (1.35-2.85)           | 1.41 (1.01-1.95)        |
| Model 3                               | 2.02 (1.38-2.96)           | 1.41 (1.02-1.97)        |
| Model 4                               | 1.67 (1.09-2.55)           | 1.32 (0.93-1.88)        |
| Model 5                               | 1.58 (1.02-2.46)           | NA                      |
| Model 6                               | 1.59 (1.03-2.46)           | 1.28 (0.90-1.83)        |

ARIC: Atherosclerosis Risk In Communities; CHD: coronary heart disease; CHS: Cardiovascular Health Study; CI: confidence interval; NA: not applicable.

\* Only 1 incident unrecognized myocardial infarction was included in the analysis among black men in CHS. This unrecognized myocardial infarction was detected in a participant who was already classified as having an incident nonfatal CHD event in the main analysis.

† Case-fatality ratios were calculated comparing blacks versus whites (reference group). Analyses were conducted using competing risk regression and multiple imputation for missing data.

Model 1 adjusts for age.

Model 2 adjusts for age, and education and income levels.

Model 3 adjusts for covariates in Model 2 plus alcohol consumption, physical activity, waist circumference and current smoking.

Model 4 adjusts for covariates in Model 3 plus diabetes, reduced estimated glomerular filtration rate, stroke, systolic blood pressure, use of antihypertensive medications, total and high-density lipoprotein cholesterol, and use of lipid-lowering medication.

Model 5 adjusts for covariates in Model 4 plus health insurance among participants <65 years of age in ARIC (all participants ≥65 years of age in CHS had Medicare).

Model 6 adjusts for covariates in Model 5 plus left ventricular hypertrophy and atrial fibrillation (except in ARIC).

**Supplemental table 16.** Case-fatality among black versus white women with incident CHD in ARIC and CHS. Secondary analysis including incident unrecognized myocardial infarctions in the definition of incident nonfatal CHD.

|                                       | 45-64 years of age<br>ARIC | ≥65 years of age<br>CHS |
|---------------------------------------|----------------------------|-------------------------|
| Case-fatality (fatal CHD / total CHD) |                            |                         |
| Blacks                                | 21.2% (28 / 132)           | 40.8% (29 / 71)         |
| Whites                                | 14.1% (29 / 205)           | 37.4% (111 / 297)       |
| Case-fatality ratio (95% CI)*         |                            |                         |
| Model 1                               | 1.55 (0.97-2.46)           | 1.01 (0.72-1.40)        |
| Model 2                               | 1.25 (0.78-1.99)           | 0.98 (0.70-1.36)        |
| Model 3                               | 1.25 (0.76-2.04)           | 0.92 (0.65-1.30)        |
| Model 4                               | 1.07 (0.65-1.76)           | 0.89 (0.63-1.26)        |
| Model 5                               | 1.11 (0.66-1.85)           | NA                      |
| Model 6                               | 1.05 (0.61-1.80)           | 0.92 (0.64-1.31)        |

ARIC: Atherosclerosis Risk In Communities; CHD: coronary heart disease; CHS:

Cardiovascular Health Study; CI: confidence interval; NA: not applicable.

\* Case-fatality ratios were calculated comparing blacks versus whites (reference group).

Analyses were conducted using multiple imputation for missing data.

Model 1 adjusts for age.

Model 2 adjusts for age, and education and income levels.

Model 3 adjusts for covariates in Model 2 plus alcohol consumption, physical activity, waist circumference and current smoking.

Model 4 adjusts for covariates in Model 3 plus diabetes, reduced estimated glomerular filtration rate, stroke, systolic blood pressure, use of antihypertensive medications, total and high-density lipoprotein cholesterol, and use of lipid-lowering medication.

Model 5 adjusts for covariates in Model 4 plus health insurance among participants <65 years of age in ARIC (all participants ≥65 years of age in CHS had Medicare).

Model 6 adjusts for covariates in Model 5 plus left ventricular hypertrophy and atrial fibrillation (except in ARIC).

**Supplemental figure 1.** Flow-chart of ARIC, CHS and REGARDS study participants included in the analysis.  
45-64 years of age ≥65 years of age

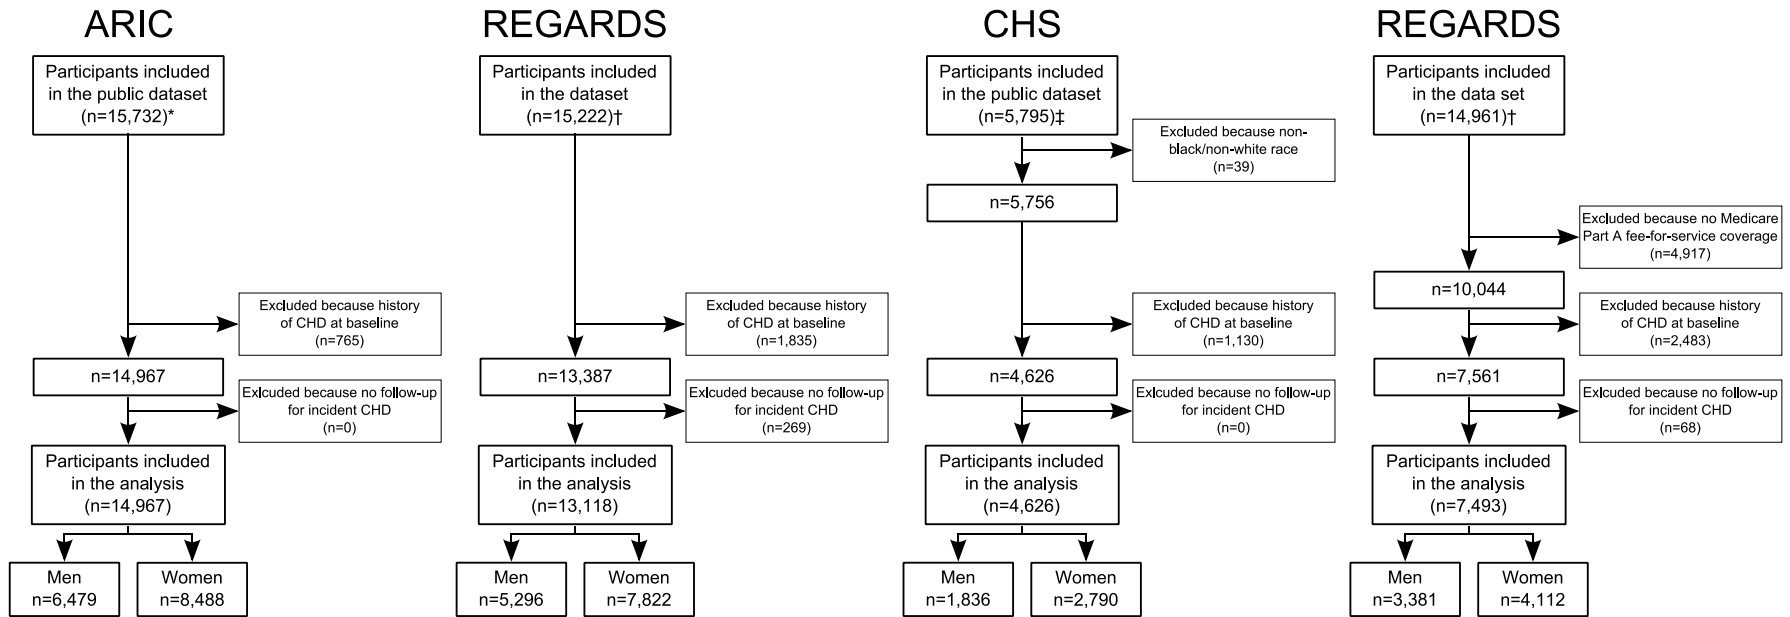

ARIC: Atherosclerosis Risk In Communities; CHD: coronary heart disease; CHS: Cardiovascular Health Study; REGARDS: REasons for Geographic And Racial Differences in Stroke. \* After excluding 60 ARIC study participants who did not allow their data to be released in the publicly available dataset. † After excluding 56 REGARDS study participants with anomalies in their informed consent. ‡ After excluding 93 CHS participants who did not allow their data to be released in the publicly available dataset.

Supplemental figure 2. Flow-chart of ARIC, CHS and REGARDS study participants included in the analysis by gender.

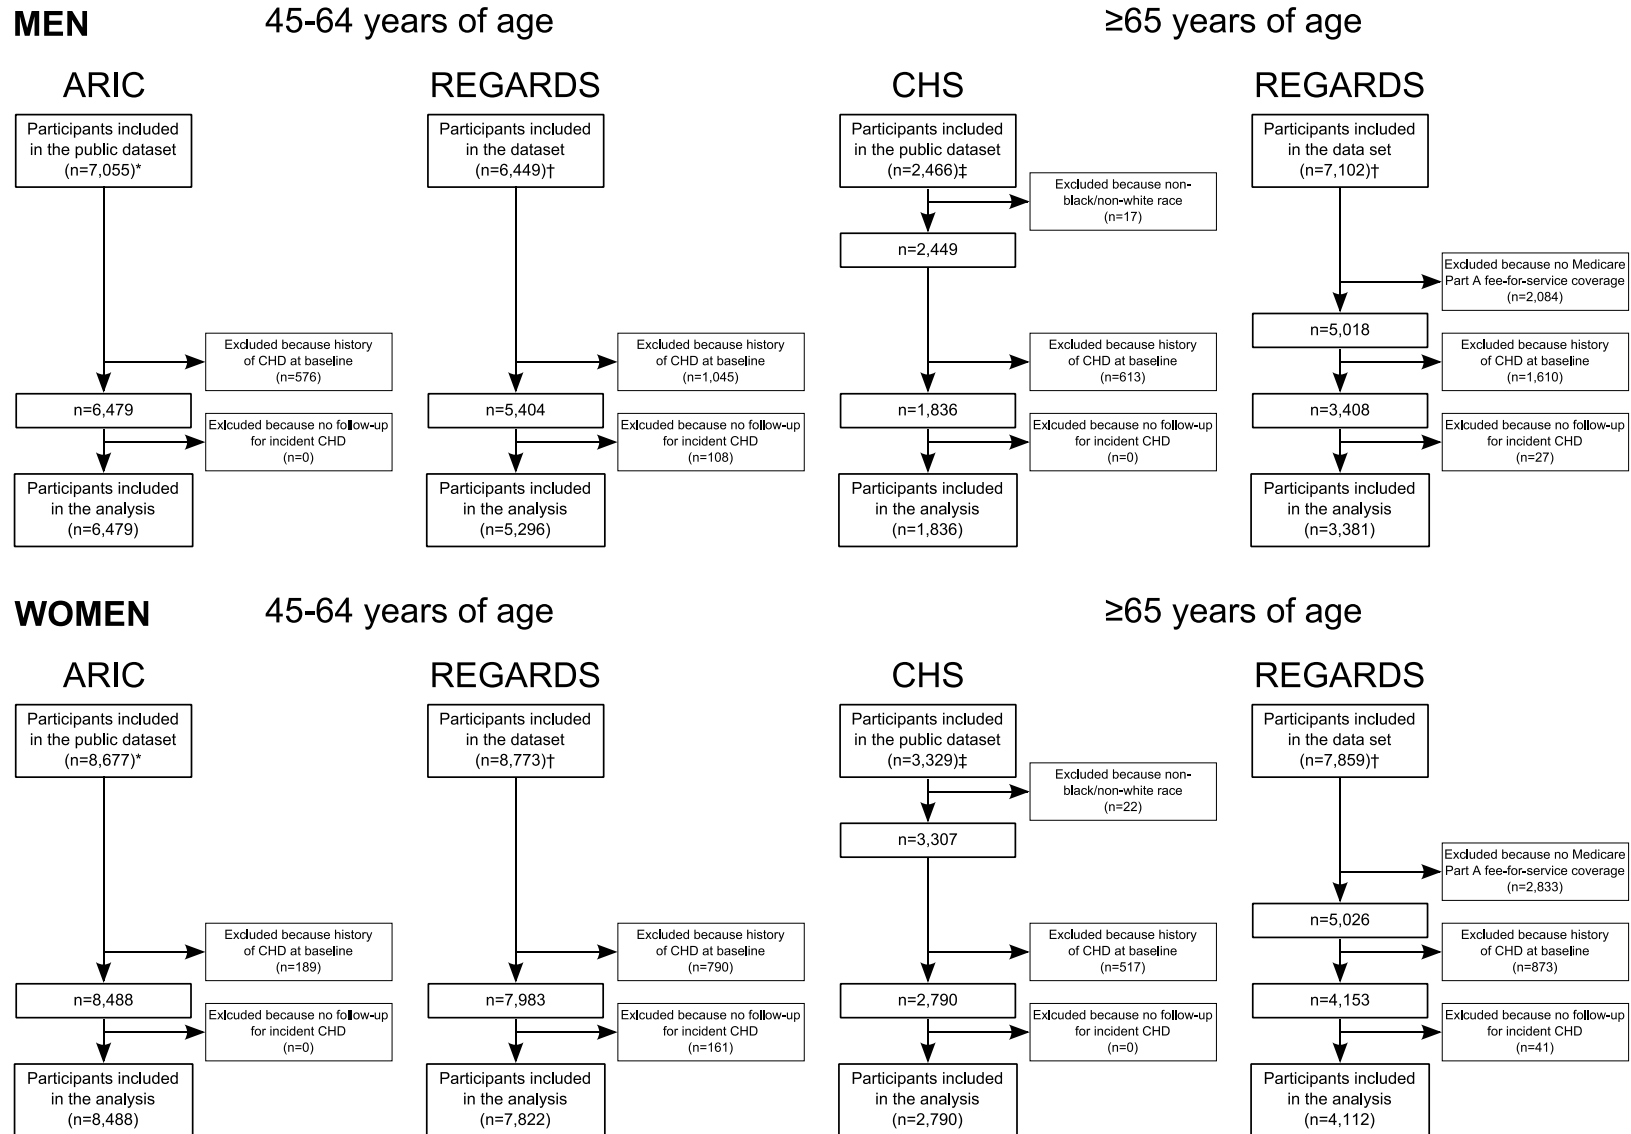

ARIC: Atherosclerosis Risk In Communities; CHD: coronary heart disease; CHS: Cardiovascular Health Study; REGARDS: REasons for Geographic And Racial Differences in Stroke. \* After excluding 60 ARIC study participants who did not allow their data to be released in the publicly available dataset. † After excluding 56 REGARDS study participants with anomalies in their informed consent. ‡ After excluding 93 CHS participants who did not allow their data to be released in the publicly available dataset.

**Supplemental figure 3.** Cumulative incidence of fatal, nonfatal and total CHD among black and white men  $\geq 65$  years of age in CHS and REGARDS.

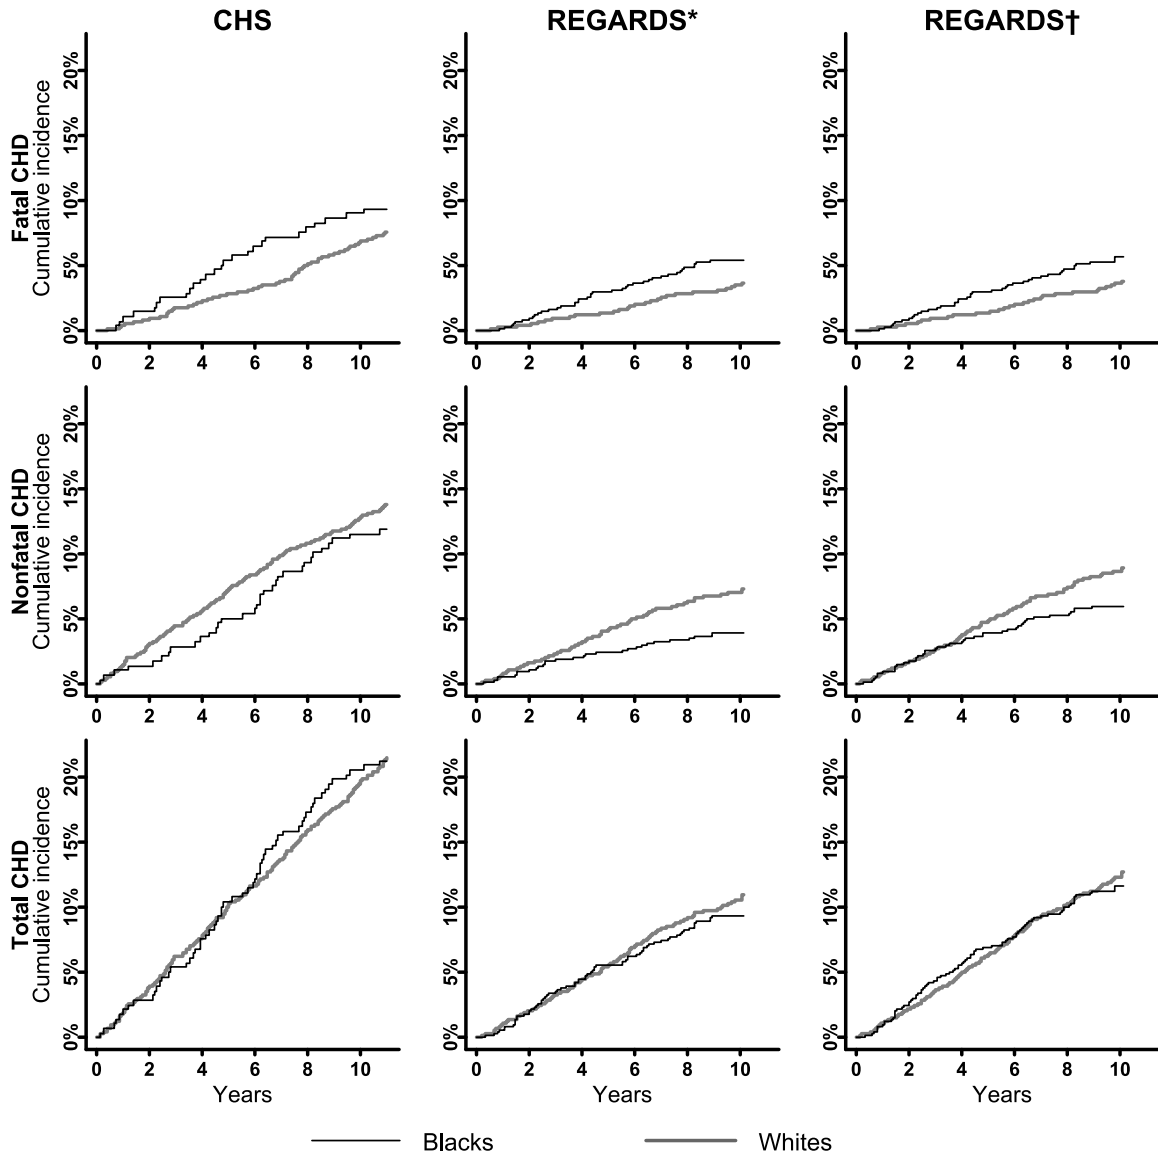

CHD: coronary heart disease; CHS: Cardiovascular Health Study; REGARDS: REasons for Geographic And Racial Differences in Stroke.

\* Using the primary definition of CHD.

† Using the secondary definition of CHD which includes myocardial infarction hospitalizations detected through Medicare claims.

The maximum follow-up for all analyses was 11 years. Mean follow-up was 8.3 years in CHS, and 7.1 years among participants in REGARDS when using the primary and secondary definitions of CHD.

**Supplemental figure 4.** Cumulative incidence of fatal, nonfatal and total CHD among black and white women  $\geq 65$  years of age in CHS and REGARDS.

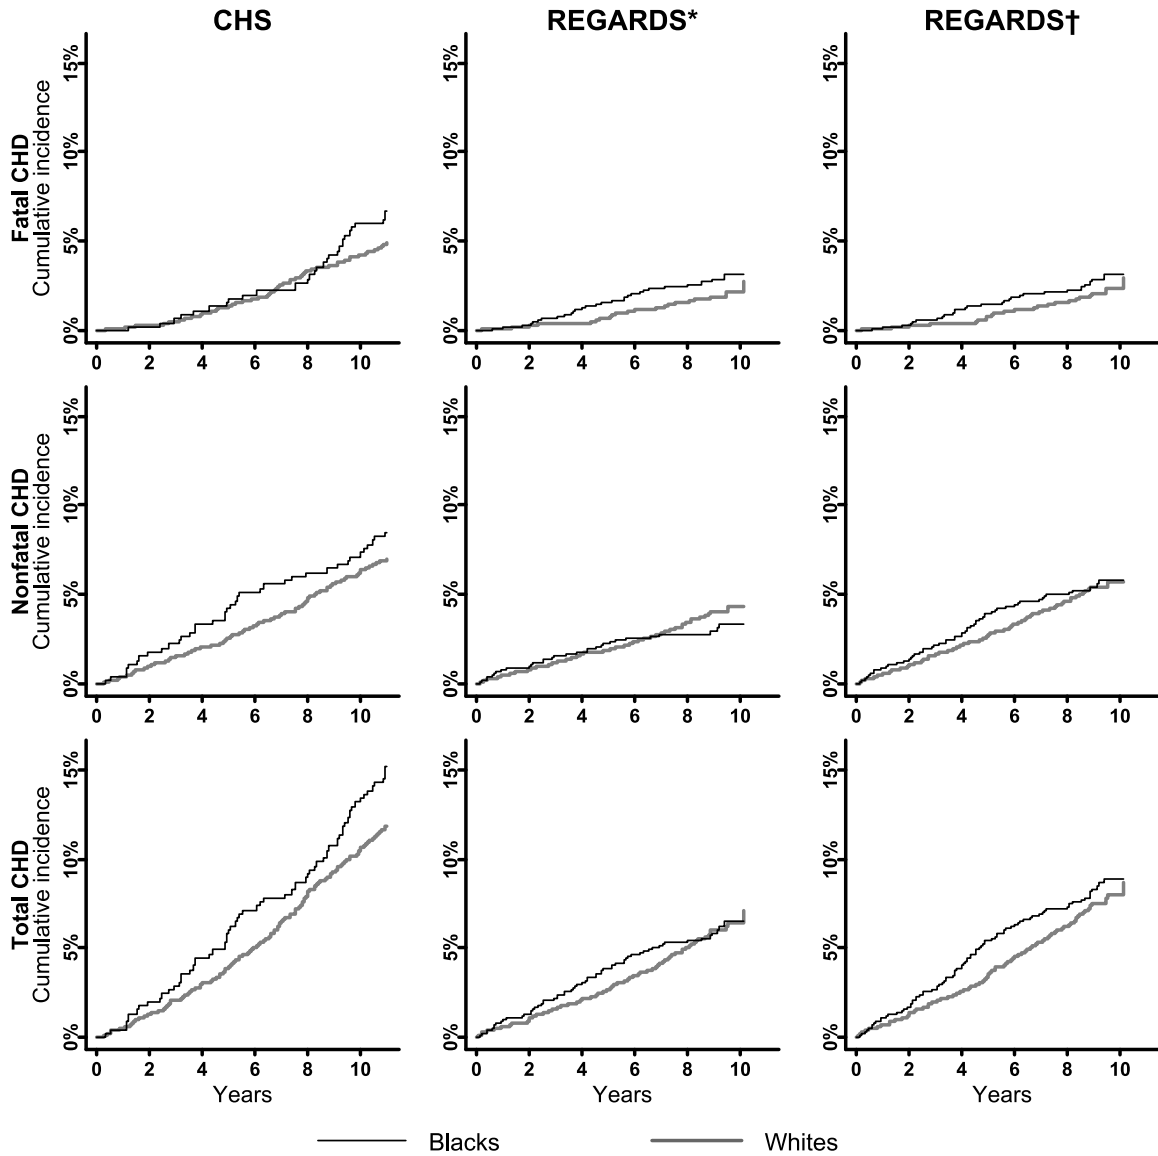

CHD: coronary heart disease; CHS: Cardiovascular Health Study; REGARDS: REasons for Geographic And Racial Differences in Stroke.

\* Using the primary definition of CHD.

† Using the secondary definition of CHD which includes myocardial infarction hospitalizations detected through Medicare claims.

The maximum follow-up for all analyses was 11 years. Mean follow-up was 9.5 years in CHS, and 7.0 years in REGARDS when using the primary and secondary definition of CHD.

**Supplemental figure 5.** P-values for gender differences on hazard ratios for incident CHD (Panel A) and case-fatality (Panel B) comparing blacks versus whites.

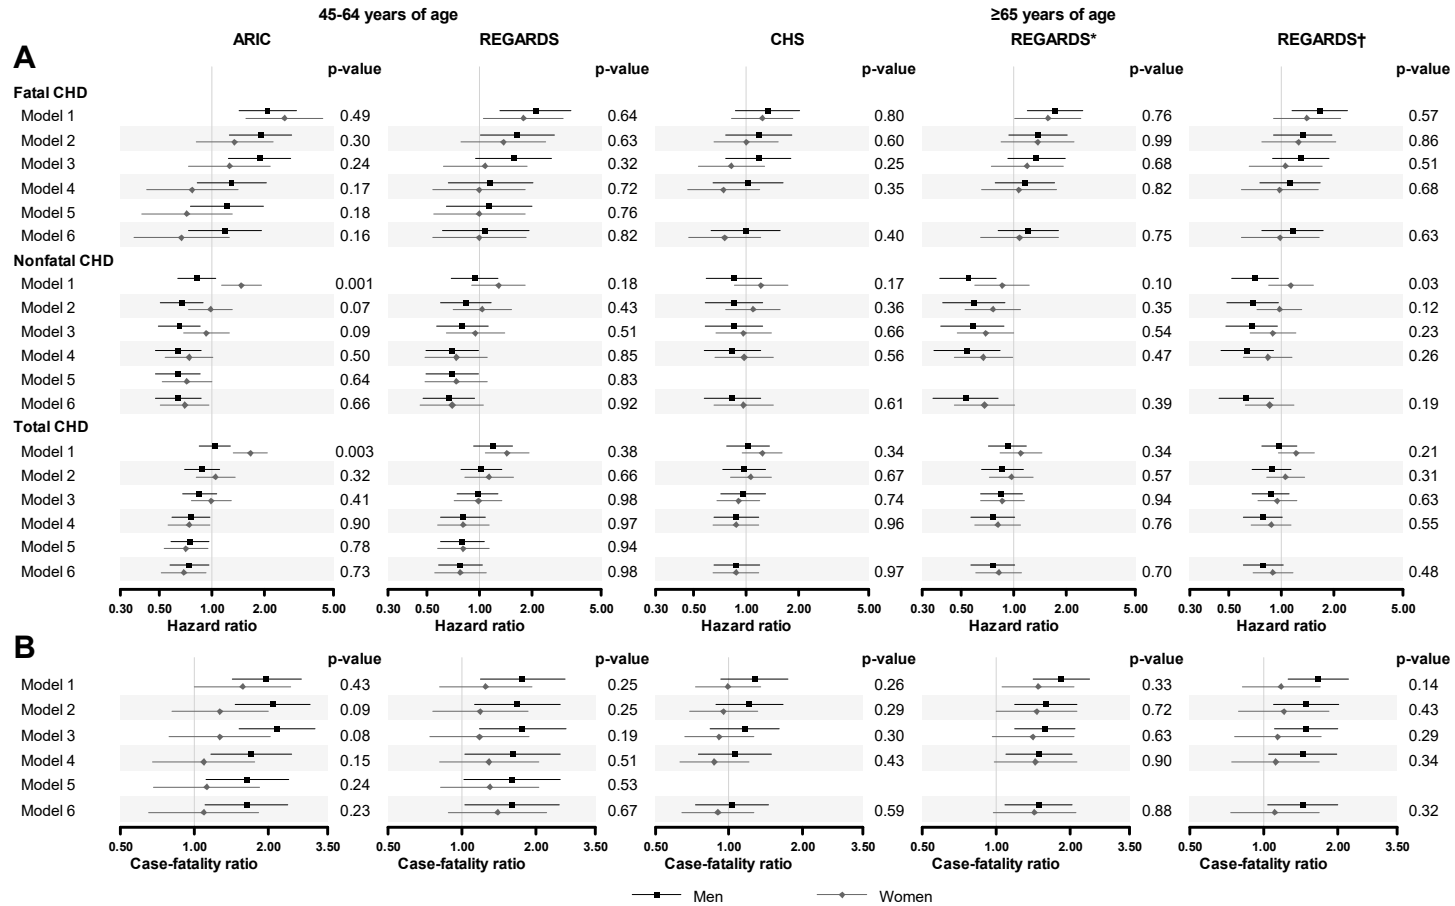

ARIC: Atherosclerosis Risk In Communities; CHD: coronary heart disease; CHS: Cardiovascular Health Study; REGARDS: REasons for Geographic And Racial Differences in Stroke.

\* Using the primary definition of CHD.

† Using the secondary definition of CHD which includes myocardial infarction hospitalizations detected through Medicare claims.

Hazard ratios were estimated using competing risk regression. All analyses were conducted using multiple imputation. Model 1 adjusts for age. Model 2 adjusts for age, education and income levels (and region of residence in REGARDS). Model 3 adjusts for covariates in Model 2 plus alcohol consumption, physical activity, waist circumference and current smoking. Model 4 adjusts for covariates in Model 3 plus diabetes, reduced estimated glomerular filtration rate, stroke, systolic blood pressure, use of antihypertensive medications, total and high-density lipoprotein cholesterol, and use of lipid-lowering medication. Model 5 adjusts for covariates in Model 4 plus health insurance among participants <65 years of age (all participants ≥65 years of age had Medicare). Model 6 adjusts for covariates in Model 5 plus left ventricular hypertrophy and atrial fibrillation (except in ARIC).
